# Supplementary material for: Cell-free DNA as a potential biomarker of differentiation and toxicity in cardiac organoids
Source: eLife journal article supplement (doi:10.7554/elife.83532), 2023-06-01

***Fragment Analyzer Run Summary:*****Filename and Data Path:** C:\AATI\Data\2021 07 21\17-10-29\2021 07 21 17H 10M.raw**Created:** Wednesday, July 21, 2021 5:26:30 PM**# of Capillaries:** 12**Array Serial #:** 072512-05LFS**Effect Length:** 55 cm**Array Usage Count:** 1817**FA Version #:** 1.0.2.9**Device Serial #:** 2656**METHOD INFORMATION****Method Name:** DNF-464-55 - HS Ext Large Fragment.mthds**Gel Prime:** No**Full Conditioning:** Yes**Gel Prime to Buffer:** No**Gel Selection:** Gel 1**Perform Prerun:** 7.0 kV, 30 sec.**Rinse:** No**Marker 1:** No**Rinse:** Tray: 3, Row: A, # Dips: 1**Sample Injection:** 9.0 kV, 30 sec.**Separation:** 7.0 kV, 95.0 min.**Tray Name:** Tray-1**Analysis Mode:** NGS**NOTE**

## Gel Image

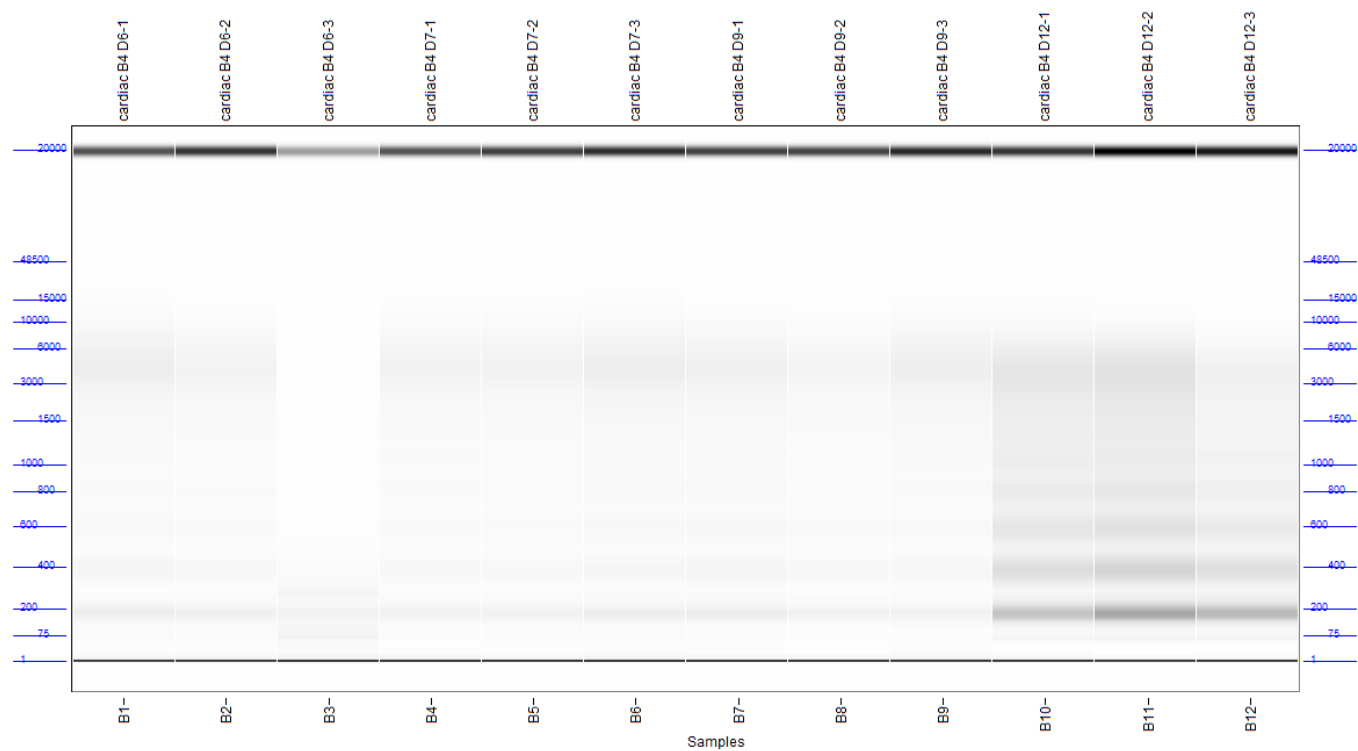

Filename and Data Path: C:\AATI\Data\2021 07 21\17-10-29\2021 07 21 17H 10M.raw

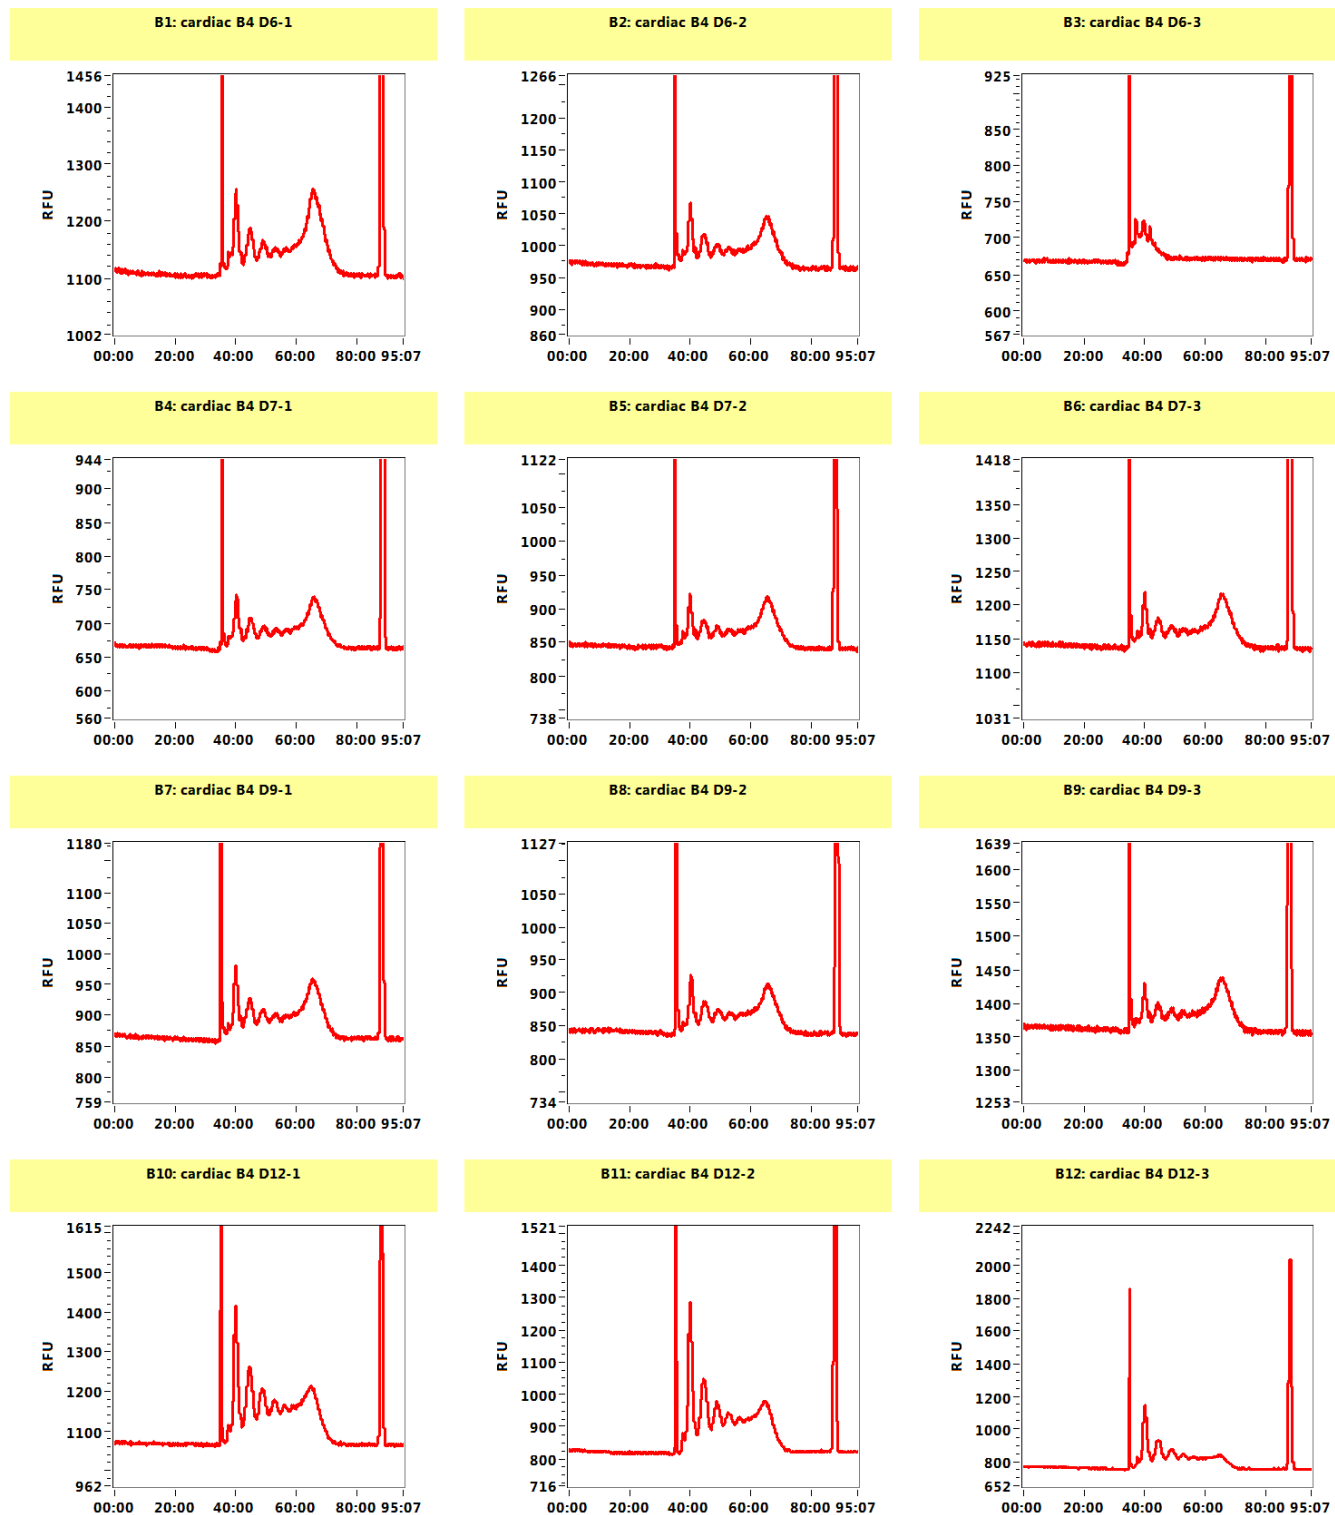

**Sample:** cardiac B4 D6-1**Well Location:** B1**Created:** Wednesday, July 21, 2021 5:26:30 PM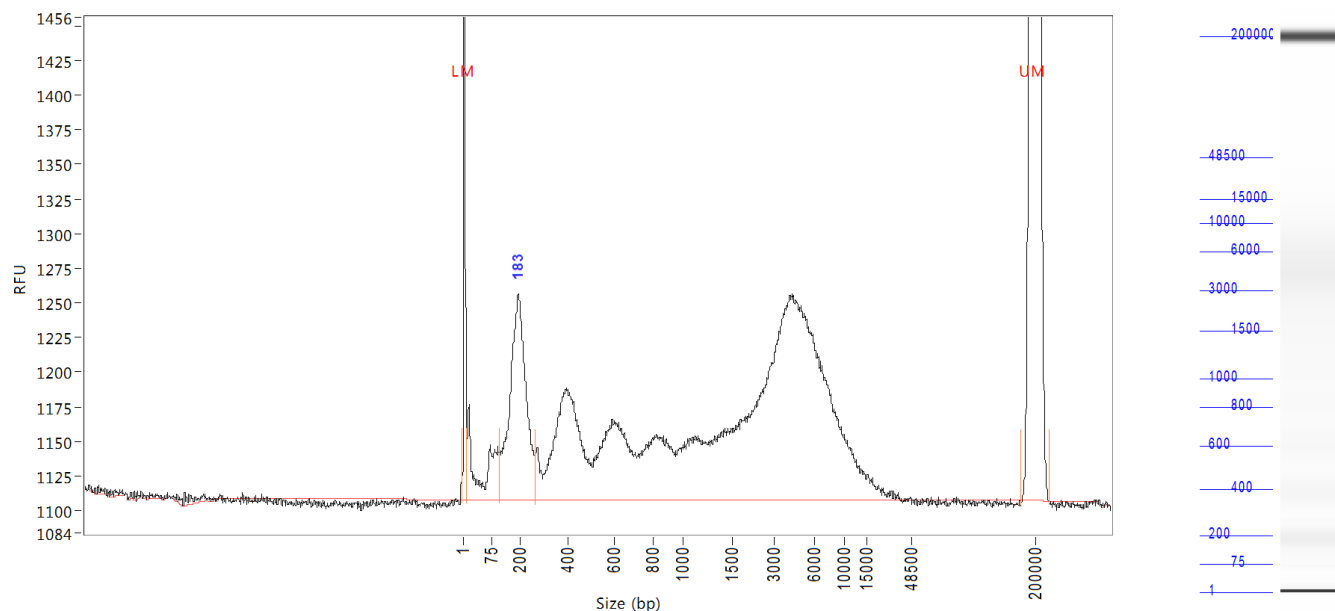

| Peak | Size<br>(bp) | Rel. Conc.<br>% |
|------|--------------|-----------------|
| 1    | 1 (LM)       |                 |
| 2    | 183          | 100.0           |
| 3    | 200000 (UM)  |                 |
|      | TIC:         | 0.1272 ng/uL    |
|      | TIM:         | 1.142 nmole/L   |
|      | Total Conc.: | 0.7876 ng/uL    |

Sample Peak Width (sec): 10    Sample Min Peak Height: 50    Sample Baseline V to V?: Y    Sample Baseline V to V pts: 3  
 Sample Filter: Binomial    # of Pts for Filter: 3    Sample Start Region (min): 0    Sample End Region (min): 95  
 Manual Baseline Start (min): 12    Manual Baseline End (min): 94  
 Marker Peak Width (sec): 5    Marker Min Peak Height: 500    Marker Baseline V to V?: N    Marker Baseline V to V pts: 3  
 Lower Marker Selection: First Peak > 500 RFU    Upper Marker Selection: Last Peak > 500 RFU  
 Ladder Size (bp): 1, 75, 200, 400, 600, 800, 1000, 1500, 3000, 6000, 10000, 15000, 48500, 200000  
 Quantification Using: Ladder    Final Concentration (ng/uL): 0.1250    Dilution Factor: 12.0  
 Min. RFU for Data Processing: 3

**Sample:** cardiac B4 D6-2**Well Location:** B2**Created:** Wednesday, July 21, 2021 5:26:30 PM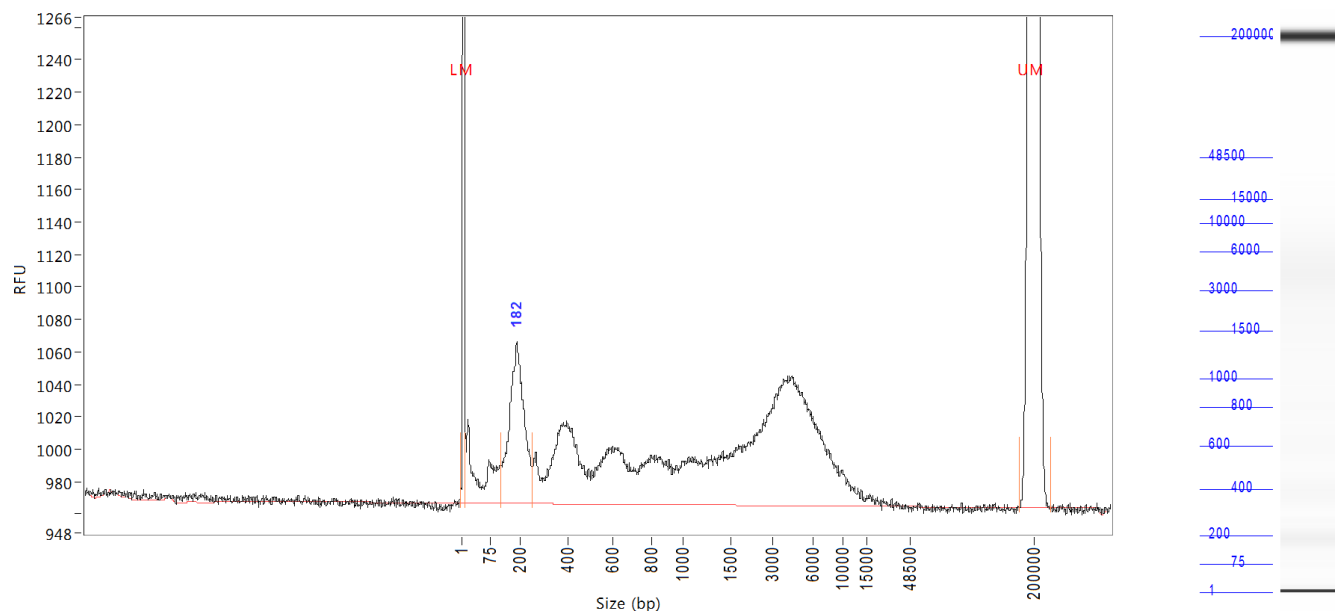

| Peak | Size<br>(bp) | Rel. Conc.<br>% |
|------|--------------|-----------------|
| 1    | 1 (LM)       |                 |
| 2    | 182          | 100.0           |
| 3    | 200000 (UM)  |                 |
|      | TIC:         | 0.1007 ng/uL    |
|      | TIM:         | 0.912 nmole/L   |
|      | Total Conc.: | 0.5976 ng/uL    |

Sample Peak Width (sec): 10    Sample Min Peak Height: 50    Sample Baseline V to V?: Y    Sample Baseline V to V pts: 3  
Sample Filter: Binomial    # of Pts for Filter: 3    Sample Start Region (min): 0    Sample End Region (min): 95  
Manual Baseline Start (min): 12    Manual Baseline End (min): 94  
Marker Peak Width (sec): 5    Marker Min Peak Height: 500    Marker Baseline V to V?: N    Marker Baseline V to V pts: 3  
Lower Marker Selection: First Peak > 500 RFU    Upper Marker Selection: Last Peak > 500 RFU  
Ladder Size (bp): 1, 75, 200, 400, 600, 800, 1000, 1500, 3000, 6000, 10000, 15000, 48500, 200000  
Quantification Using: Ladder    Final Concentration (ng/uL): 0.1250    Dilution Factor: 12.0  
Min. RFU for Data Processing: 3

**Sample:** cardiac B4 D6-3**Well Location:** B3**Created:** Wednesday, July 21, 2021 5:26:30 PM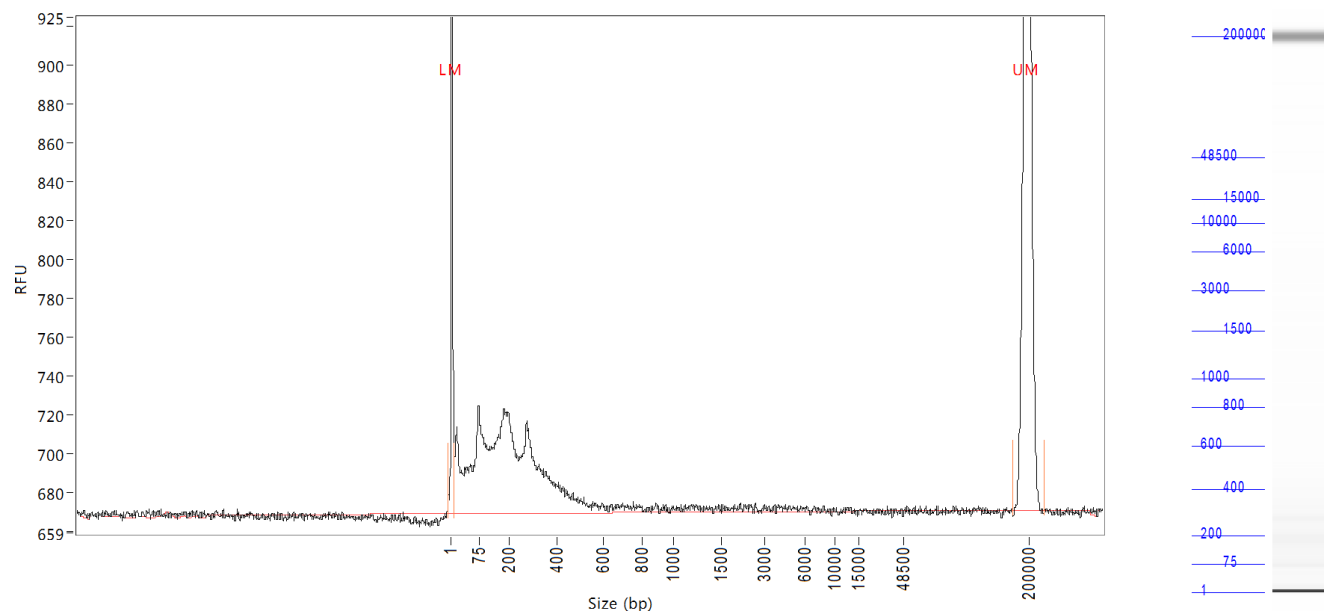

| Peak | Size (bp)    | Rel. Conc. %  |
|------|--------------|---------------|
| 1    | 1 (LM)       |               |
| 2    | 200000 (UM)  |               |
|      | TIC:         | 0.0000 ng/uL  |
|      | TIM:         | 0.000 nmole/L |
|      | Total Conc.: | 0.2725 ng/uL  |

Sample Peak Width (sec): 10    Sample Min Peak Height: 50    Sample Baseline V to V?: Y    Sample Baseline V to V pts: 3  
 Sample Filter: Binomial    # of Pts for Filter: 3    Sample Start Region (min): 0    Sample End Region (min): 95  
 Manual Baseline Start (min): 12    Manual Baseline End (min): 94  
 Marker Peak Width (sec): 5    Marker Min Peak Height: 500    Marker Baseline V to V?: N    Marker Baseline V to V pts: 3  
 Lower Marker Selection: First Peak > 500 RFU    Upper Marker Selection: Last Peak > 500 RFU  
 Ladder Size (bp): 1, 75, 200, 400, 600, 800, 1000, 1500, 3000, 6000, 10000, 15000, 48500, 200000  
 Quantification Using: Ladder    Final Concentration (ng/uL): 0.1250    Dilution Factor: 12.0  
 Min. RFU for Data Processing: 3

**Sample:** cardiac B4 D7-1**Well Location:** B4**Created:** Wednesday, July 21, 2021 5:26:30 PM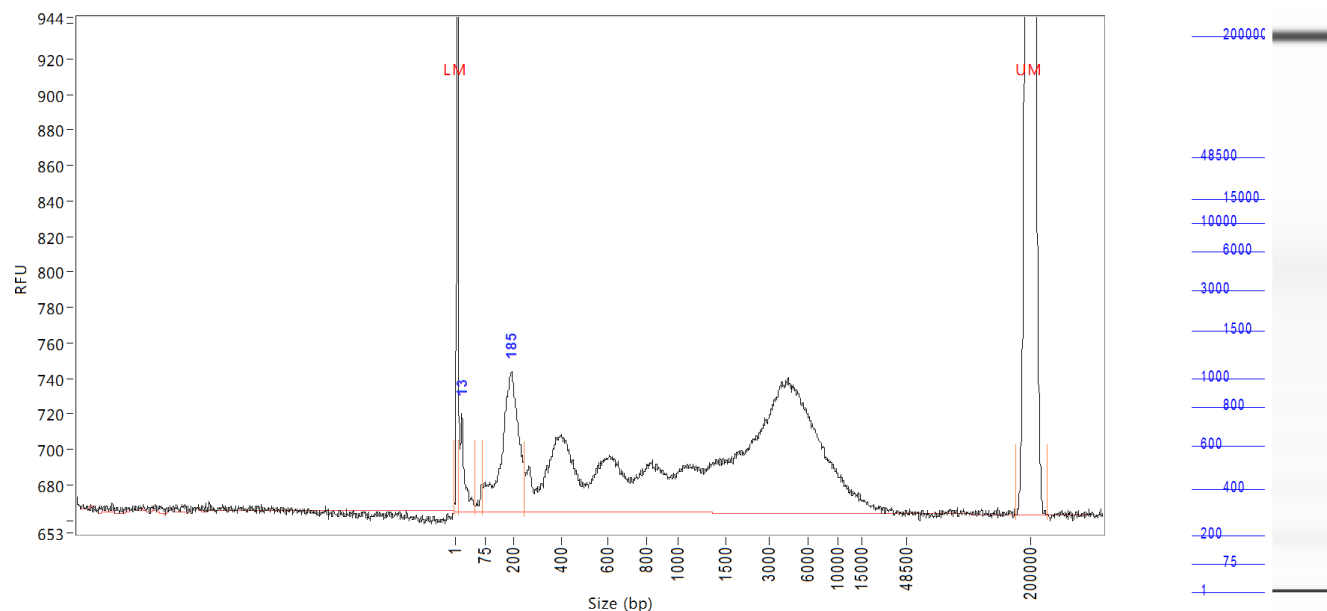

| Peak                      | Size<br>(bp) | Rel. Conc.<br>% |
|---------------------------|--------------|-----------------|
| 1                         | 1 (LM)       |                 |
| 2                         | 13           | 15.1            |
| 3                         | 185          | 84.9            |
| 4                         | 200000 (UM)  |                 |
| TIC: 0.1175 ng/uL         |              |                 |
| TIM: 3.051 nmole/L        |              |                 |
| Total Conc.: 0.5875 ng/uL |              |                 |

Sample Peak Width (sec): 10    Sample Min Peak Height: 50    Sample Baseline V to V?: Y    Sample Baseline V to V pts: 3  
 Sample Filter: Binomial    # of Pts for Filter: 3    Sample Start Region (min): 0    Sample End Region (min): 95  
 Manual Baseline Start (min): 12    Manual Baseline End (min): 94  
 Marker Peak Width (sec): 5    Marker Min Peak Height: 500    Marker Baseline V to V?: N    Marker Baseline V to V pts: 3  
 Lower Marker Selection: First Peak > 500 RFU    Upper Marker Selection: Last Peak > 500 RFU  
 Ladder Size (bp): 1, 75, 200, 400, 600, 800, 1000, 1500, 3000, 6000, 10000, 15000, 48500, 200000  
 Quantification Using: Ladder    Final Concentration (ng/uL): 0.1250    Dilution Factor: 12.0  
 Min. RFU for Data Processing: 3

**Sample:** cardiac B4 D7-2**Well Location:** B5**Created:** Wednesday, July 21, 2021 5:26:30 PM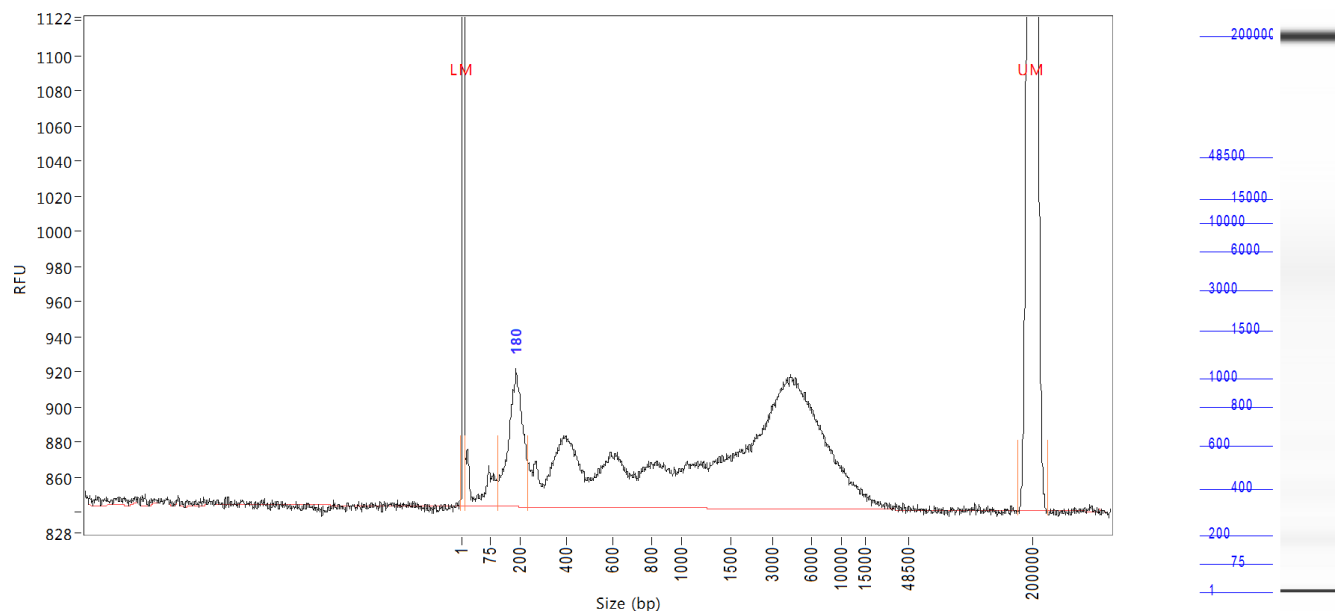

| Peak | Size<br>(bp) | Rel. Conc.<br>% |
|------|--------------|-----------------|
| 1    | 1 (LM)       |                 |
| 2    | 180          | 100.0           |
| 3    | 200000 (UM)  |                 |
|      | TIC:         | 0.0860 ng/uL    |
|      | TIM:         | 0.785 nmole/L   |
|      | Total Conc.: | 0.5886 ng/uL    |

Sample Peak Width (sec): 10    Sample Min Peak Height: 50    Sample Baseline V to V?: Y    Sample Baseline V to V pts: 3  
 Sample Filter: Binomial    # of Pts for Filter: 3    Sample Start Region (min): 0    Sample End Region (min): 95  
 Manual Baseline Start (min): 12    Manual Baseline End (min): 94  
 Marker Peak Width (sec): 5    Marker Min Peak Height: 500    Marker Baseline V to V?: N    Marker Baseline V to V pts: 3  
 Lower Marker Selection: First Peak > 500 RFU    Upper Marker Selection: Last Peak > 500 RFU  
 Ladder Size (bp): 1, 75, 200, 400, 600, 800, 1000, 1500, 3000, 6000, 10000, 15000, 48500, 200000  
 Quantification Using: Ladder    Final Concentration (ng/uL): 0.1250    Dilution Factor: 12.0  
 Min. RFU for Data Processing: 3



**Sample:** cardiac B4 D7-3**Well Location:** B6**Created:** Wednesday, July 21, 2021 5:26:30 PM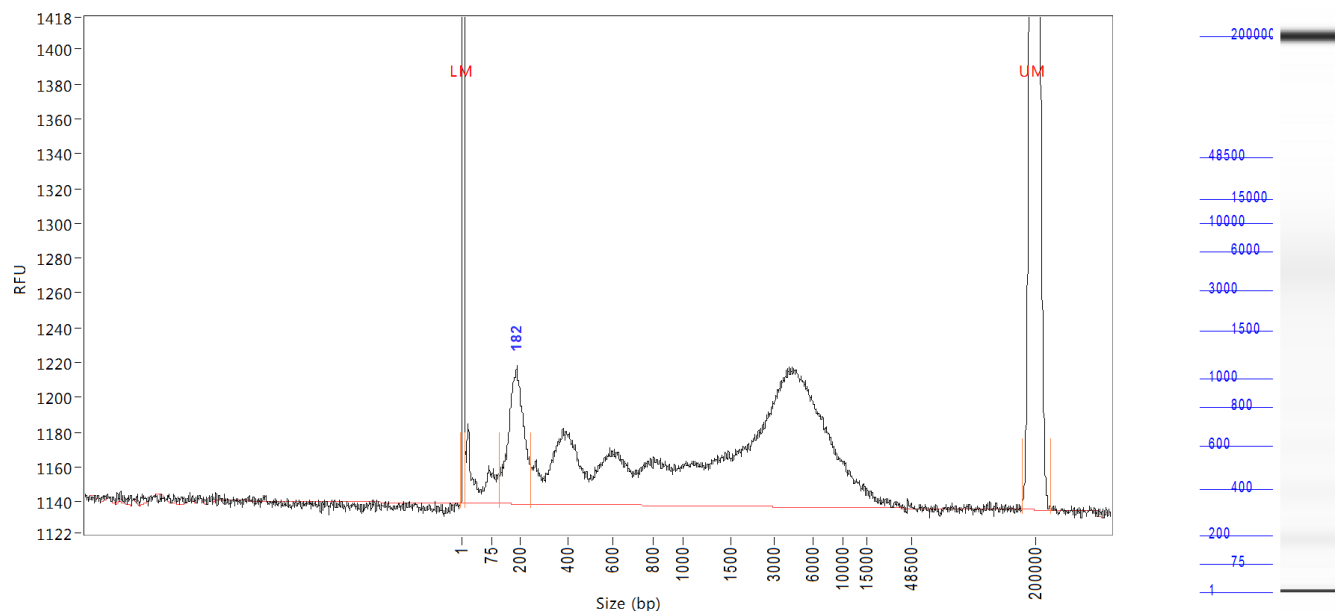

| Peak | Size<br>(bp) | Rel. Conc.<br>% |
|------|--------------|-----------------|
| 1    | 1 (LM)       |                 |
| 2    | 182          | 100.0           |
| 3    | 200000 (UM)  |                 |
|      | TIC:         | 0.1157 ng/uL    |
|      | TIM:         | 1.047 nmole/L   |
|      | Total Conc.: | 0.7655 ng/uL    |

Sample Peak Width (sec): 10    Sample Min Peak Height: 50    Sample Baseline V to V?: Y    Sample Baseline V to V pts: 3  
Sample Filter: Binomial    # of Pts for Filter: 3    Sample Start Region (min): 0    Sample End Region (min): 95  
Manual Baseline Start (min): 12    Manual Baseline End (min): 94  
Marker Peak Width (sec): 5    Marker Min Peak Height: 500    Marker Baseline V to V?: N    Marker Baseline V to V pts: 3  
Lower Marker Selection: First Peak > 500 RFU    Upper Marker Selection: Last Peak > 500 RFU  
Ladder Size (bp): 1, 75, 200, 400, 600, 800, 1000, 1500, 3000, 6000, 10000, 15000, 48500, 200000  
Quantification Using: Ladder    Final Concentration (ng/uL): 0.1250    Dilution Factor: 12.0  
Min. RFU for Data Processing: 3

**Sample:** cardiac B4 D9-1**Well Location:** B7**Created:** Wednesday, July 21, 2021 5:26:30 PM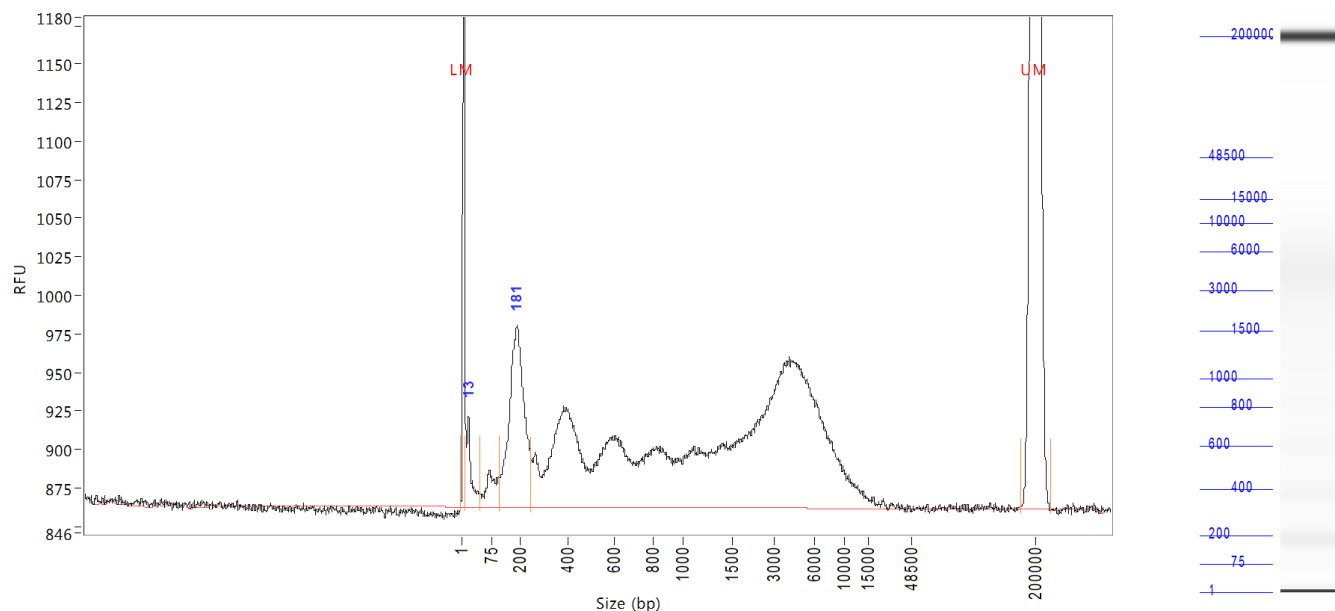

| Peak | Size<br>(bp) | Rel. Conc.<br>% |
|------|--------------|-----------------|
| 1    | 1 (LM)       |                 |
| 2    | 13           | 13.4            |
| 3    | 181          | 86.6            |
| 4    | 200000 (UM)  |                 |

|              |        |         |
|--------------|--------|---------|
| TIC:         | 0.1398 | ng/uL   |
| TIM:         | 3.390  | nmole/L |
| Total Conc.: | 0.7525 | ng/uL   |

Sample Peak Width (sec): 10    Sample Min Peak Height: 50    Sample Baseline V to V?: Y    Sample Baseline V to V pts: 3  
 Sample Filter: Binomial    # of Pts for Filter: 3    Sample Start Region (min): 0    Sample End Region (min): 95  
 Manual Baseline Start (min): 12    Manual Baseline End (min): 94  
 Marker Peak Width (sec): 5    Marker Min Peak Height: 500    Marker Baseline V to V?: N    Marker Baseline V to V pts: 3  
 Lower Marker Selection: First Peak > 500 RFU    Upper Marker Selection: Last Peak > 500 RFU  
 Ladder Size (bp): 1, 75, 200, 400, 600, 800, 1000, 1500, 3000, 6000, 10000, 15000, 48500, 200000  
 Quantification Using: Ladder    Final Concentration (ng/uL): 0.1250    Dilution Factor: 12.0  
 Min. RFU for Data Processing: 3

**Sample:** cardiac B4 D9-2**Well Location:** B8**Created:** Wednesday, July 21, 2021 5:26:30 PM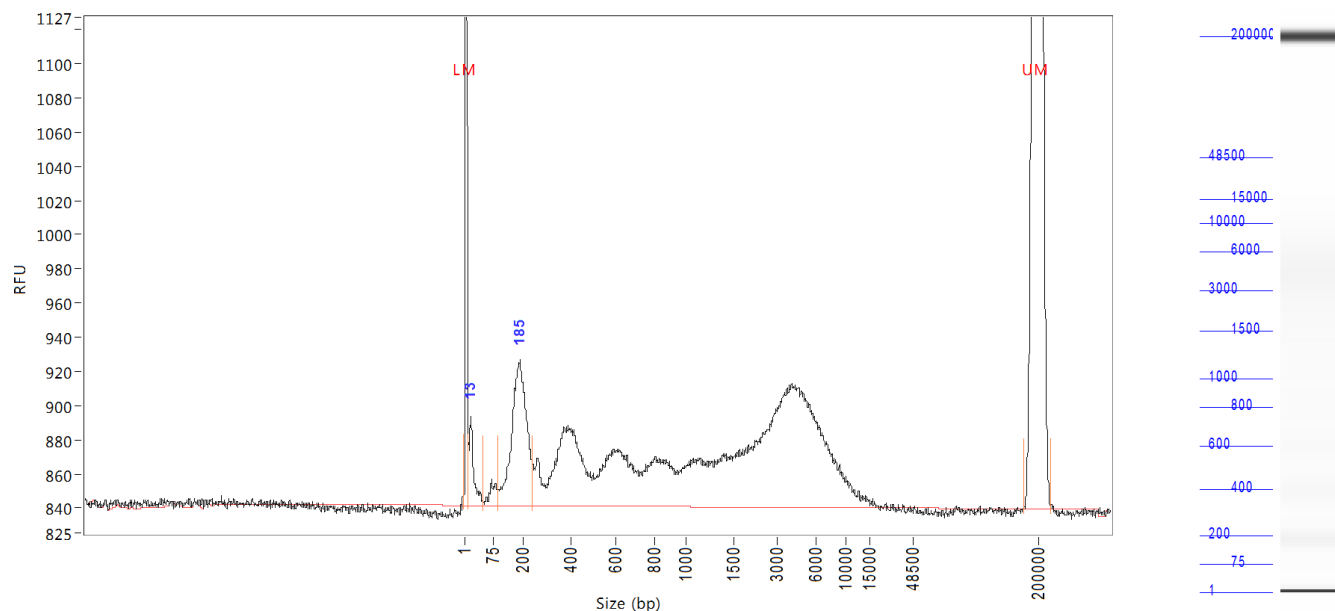

| Peak                      | Size<br>(bp) | Rel. Conc.<br>% |
|---------------------------|--------------|-----------------|
| 1                         | 1 (LM)       |                 |
| 2                         | 13           | 14.4            |
| 3                         | 185          | 85.6            |
| 4                         | 200000 (UM)  |                 |
| TIC: 0.1012 ng/uL         |              |                 |
| TIM: 2.605 nmole/L        |              |                 |
| Total Conc.: 0.5244 ng/uL |              |                 |

Sample Peak Width (sec): 10    Sample Min Peak Height: 50    Sample Baseline V to V?: Y    Sample Baseline V to V pts: 3  
Sample Filter: Binomial    # of Pts for Filter: 3    Sample Start Region (min): 0    Sample End Region (min): 95  
Manual Baseline Start (min): 12    Manual Baseline End (min): 94  
Marker Peak Width (sec): 5    Marker Min Peak Height: 500    Marker Baseline V to V?: N    Marker Baseline V to V pts: 3  
Lower Marker Selection: First Peak > 500 RFU    Upper Marker Selection: Last Peak > 500 RFU  
Ladder Size (bp): 1, 75, 200, 400, 600, 800, 1000, 1500, 3000, 6000, 10000, 15000, 48500, 200000  
Quantification Using: Ladder    Final Concentration (ng/uL): 0.1250    Dilution Factor: 12.0  
Min. RFU for Data Processing: 3

**Sample:** cardiac B4 D9-3**Well Location:** B9**Created:** Wednesday, July 21, 2021 5:26:30 PM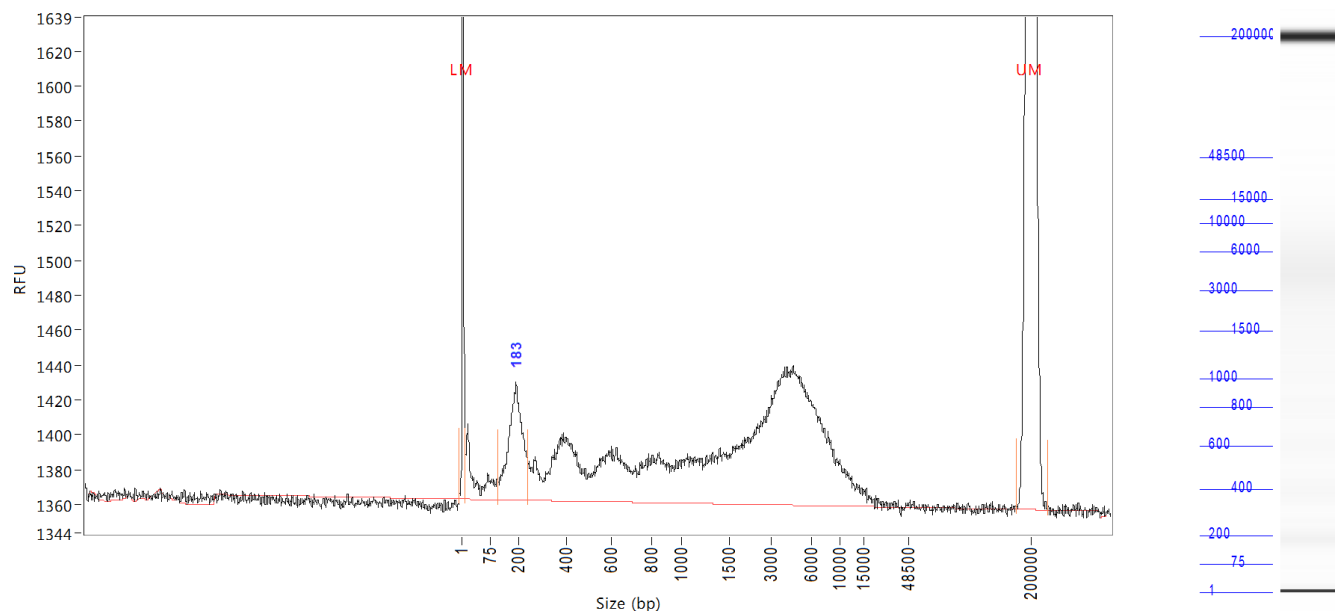

| Peak | Size<br>(bp) | Rel. Conc.<br>% |
|------|--------------|-----------------|
| 1    | 1 (LM)       |                 |
| 2    | 183          | 100.0           |
| 3    | 200000 (UM)  |                 |
|      | TIC:         | 0.0812 ng/uL    |
|      | TIM:         | 0.729 nmole/L   |
|      | Total Conc.: | 0.6524 ng/uL    |

Sample Peak Width (sec): 10    Sample Min Peak Height: 50    Sample Baseline V to V?: Y    Sample Baseline V to V pts: 3  
Sample Filter: Binomial    # of Pts for Filter: 3    Sample Start Region (min): 0    Sample End Region (min): 95  
Manual Baseline Start (min): 12    Manual Baseline End (min): 94  
Marker Peak Width (sec): 5    Marker Min Peak Height: 500    Marker Baseline V to V?: N    Marker Baseline V to V pts: 3  
Lower Marker Selection: First Peak > 500 RFU    Upper Marker Selection: Last Peak > 500 RFU  
Ladder Size (bp): 1, 75, 200, 400, 600, 800, 1000, 1500, 3000, 6000, 10000, 15000, 48500, 200000  
Quantification Using: Ladder    Final Concentration (ng/uL): 0.1250    Dilution Factor: 12.0  
Min. RFU for Data Processing: 3

**Sample:** cardiac B4 D12-1**Well Location:** B10**Created:** Wednesday, July 21, 2021 5:26:30 PM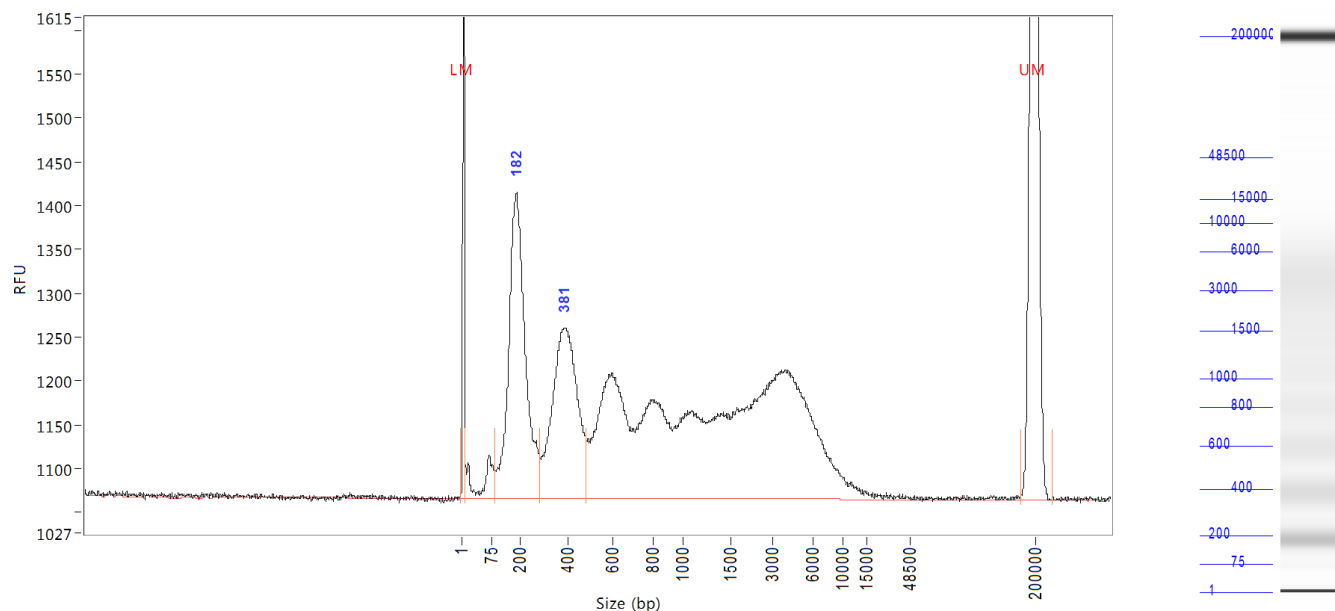

| Peak | Size<br>(bp) | Rel. Conc.<br>% |
|------|--------------|-----------------|
| 1    | 1 (LM)       |                 |
| 2    | 182          | 56.7            |
| 3    | 381          | 43.3            |
| 4    | 200000 (UM)  |                 |

|              |        |         |
|--------------|--------|---------|
| TIC:         | 0.8229 | ng/uL   |
| TIM:         | 5.742  | nmole/L |
| Total Conc.: | 2.0927 | ng/uL   |

Sample Peak Width (sec): 10    Sample Min Peak Height: 50    Sample Baseline V to V?: Y    Sample Baseline V to V pts: 3  
 Sample Filter: Binomial    # of Pts for Filter: 3    Sample Start Region (min): 0    Sample End Region (min): 95  
 Manual Baseline Start (min): 12    Manual Baseline End (min): 94  
 Marker Peak Width (sec): 5    Marker Min Peak Height: 500    Marker Baseline V to V?: N    Marker Baseline V to V pts: 3  
 Lower Marker Selection: First Peak > 500 RFU    Upper Marker Selection: Last Peak > 500 RFU  
 Ladder Size (bp): 1, 75, 200, 400, 600, 800, 1000, 1500, 3000, 6000, 10000, 15000, 48500, 200000  
 Quantification Using: Ladder    Final Concentration (ng/uL): 0.1250    Dilution Factor: 12.0  
 Min. RFU for Data Processing: 3

**Sample:** cardiac B4 D12-2**Well Location:** B11**Created:** Wednesday, July 21, 2021 5:26:30 PM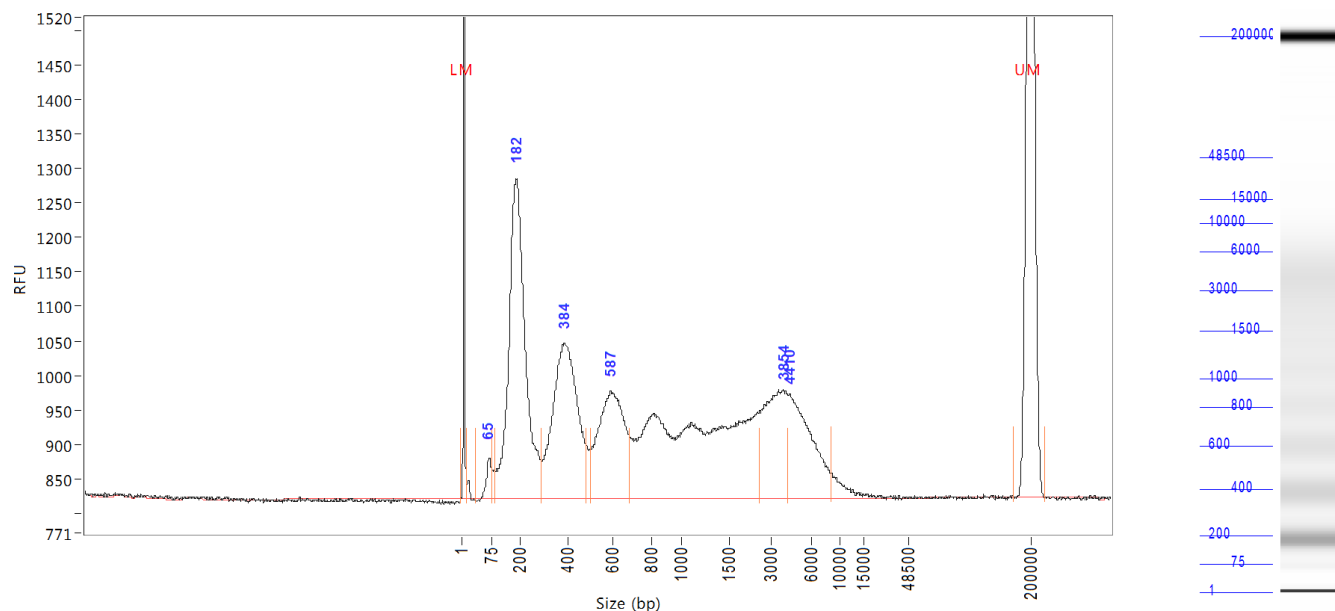

| Peak | Size<br>(bp) | Rel. Conc.<br>% |
|------|--------------|-----------------|
| 1    | 1 (LM)       |                 |
| 2    | 65           | 1.5             |
| 3    | 182          | 36.9            |
| 4    | 384          | 24.6            |
| 5    | 587          | 15.9            |
| 6    | 3854         | 11.1            |
| 7    | 4410         | 10.0            |
| 8    | 200000 (UM)  |                 |

|              |        |         |
|--------------|--------|---------|
| TIC:         | 1.8742 | ng/uL   |
| TIM:         | 9.952  | nmole/L |
| Total Conc.: | 2.6515 | ng/uL   |

Sample Peak Width (sec): 10    Sample Min Peak Height: 50    Sample Baseline V to V?: Y    Sample Baseline V to V pts: 3  
 Sample Filter: Binomial    # of Pts for Filter: 3    Sample Start Region (min): 0    Sample End Region (min): 95  
 Manual Baseline Start (min): 12    Manual Baseline End (min): 94  
 Marker Peak Width (sec): 5    Marker Min Peak Height: 500    Marker Baseline V to V?: N    Marker Baseline V to V pts: 3  
 Lower Marker Selection: First Peak > 500 RFU    Upper Marker Selection: Last Peak > 500 RFU  
 Ladder Size (bp): 1, 75, 200, 400, 600, 800, 1000, 1500, 3000, 6000, 10000, 15000, 48500, 200000  
 Quantification Using: Ladder    Final Concentration (ng/uL): 0.1250    Dilution Factor: 12.0  
 Min. RFU for Data Processing: 3

**Sample:** cardiac B4 D12-3**Well Location:** B12**Created:** Wednesday, July 21, 2021 5:26:30 PM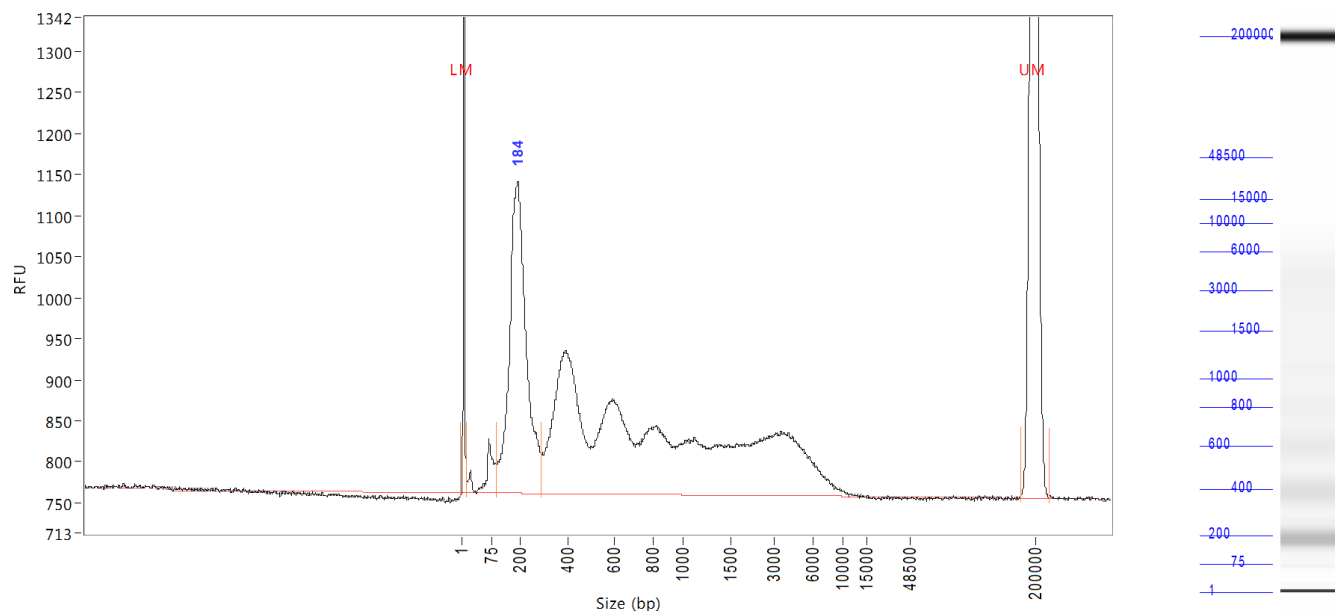

| Peak | Size<br>(bp) | Rel. Conc.<br>% |
|------|--------------|-----------------|
| 1    | 1 (LM)       |                 |
| 2    | 184          | 100.0           |
| 3    | 200000 (UM)  |                 |

|              |        |         |
|--------------|--------|---------|
| TIC:         | 0.5297 | ng/uL   |
| TIM:         | 4.736  | nmole/L |
| Total Conc.: | 1.6995 | ng/uL   |

Sample Peak Width (sec): 10    Sample Min Peak Height: 200    Sample Baseline V to V?: Y    Sample Baseline V to V pts: 3  
Sample Filter: Binomial    # of Pts for Filter: 3    Sample Start Region (min): 0    Sample End Region (min): 95  
Manual Baseline Start (min): 12    Manual Baseline End (min): 94  
Marker Peak Width (sec): 5    Marker Min Peak Height: 500    Marker Baseline V to V?: N    Marker Baseline V to V pts: 3  
Lower Marker Selection: First Peak > 500 RFU    Upper Marker Selection: Last Peak > 500 RFU  
Ladder Size (bp): 1, 75, 200, 400, 600, 800, 1000, 1500, 3000, 6000, 10000, 15000, 48500, 200000  
Quantification Using: Ladder    Final Concentration (ng/uL): 0.1250    Dilution Factor: 12.0  
Min. RFU for Data Processing: 3

**Sample:** DNA Size Ladder**Well Location:** A12**Created:** Wednesday, July 21, 2021 5:26:30 PM**Import From:** C:\Users\aatl\Desktop\cfDNA ladder.SCAL**Fit Type:** Point to Point

Calibration Curve

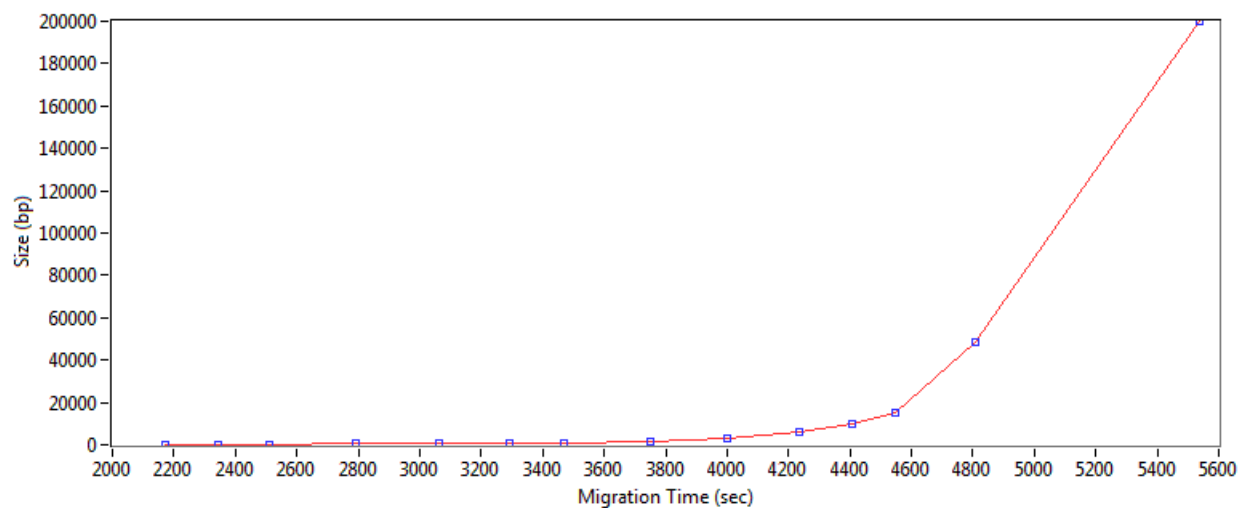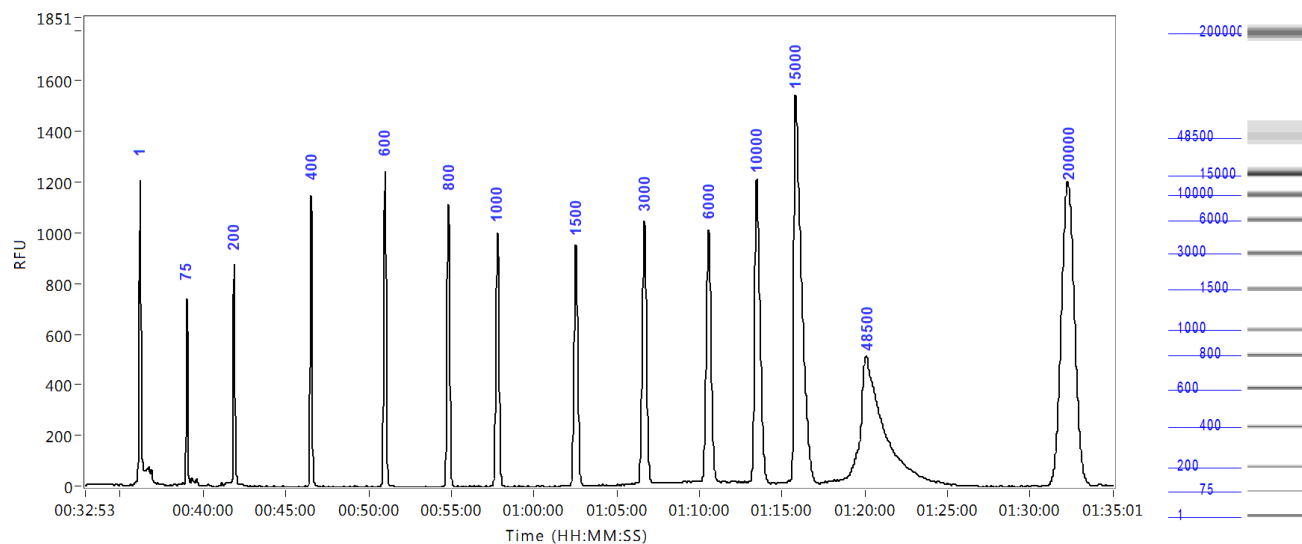

Supplement: supp [file elife-83532-supp-v1.zip]
