# Supplementary material for: Cell-free DNA as a potential biomarker of differentiation and toxicity in cardiac organoids
Source: eLife journal article supplement (doi:10.7554/elife.83532), 2023-06-01
Supplement: fig1-data1 [file 1B_beat counts untreated cardiac tissues.xlsx]

## Sheet: Sheet1
From 3D cardiotox, untreated tissues
obtained by counting the number of beats in 15s, then multiplying by 4 for beats per min (ex, 7 beats in 15s = 28bpm)
3D cardiotox R1	Day 6	Day 9
R1 Tissue 1	28	20
R1 Tissue 2	28	20
R1 Tissue 3	28	24
R1 Tissue 4
R1 Tissue 5
3D cardiotox R2
R2 Tissue 1	16	20	*day 9 from batch 8
R2 Tissue 2	64
R2 Tissue 3	28
R2 Tissue 4
R2 Tissue 5
3D cardiotox R3
R3 Tissue 1	24	20
R3 Tissue 2	28	28
R3 Tissue 3	24	16
R3 Tissue 4		12
R3 Tissue 5
