# Supplementary material for: Cell-free DNA as a potential biomarker of differentiation and toxicity in cardiac organoids
Source: eLife journal article supplement (doi:10.7554/elife.83532), 2023-06-01
Supplement: fig1-data1 [file 1C, D, E normalization_cardiac organoid tissue GAPDH and markers.xlsx]

## Sheet: GAPDH
Sample	Target	Concentration	Avg conc	Normalization Factor		GAPDH norm factors	day 1	day 2	day 4	day 6	day 9	day 14
Day 1, B2	GAPDH	5760	6030	0.787492		B2	0.787492	1.15577	0.583763	0.708481	1.43002	1.00232
Day 1, B2	GAPDH	6300				B4	1.1623	1.37778	0.970326	0.968367	1.16883	0.689545
Day 1, B4	GAPDH	9000	8900	1.1623		B8	1.04868	1.31249	0.926576	0.884133	1.18189	0.641225
Day 1, B4	GAPDH	8800
Day 1, B8	GAPDH	8100	8030	1.04868
Day 1, B8	GAPDH	7960
Day 2, B2	GAPDH	8600	8850	1.15577
Day 2, B2	GAPDH	9100
Day 2, B4	GAPDH	10300	10550	1.37778
Day 2, B4	GAPDH	10800
Day 2, B8	GAPDH	9700	10050	1.31249
Day 2, B8	GAPDH	10400
Day 4, B2	GAPDH	4280	4470	0.583763
Day 4, B2	GAPDH	4660
Day 4, B4	GAPDH	7450	7430	0.970326
Day 4, B4	GAPDH	7410
Day 4, B8	GAPDH	6670	7095	0.926576
Day 4, B8	GAPDH	7520
Day 6, B2	GAPDH	5040	5425	0.708481
Day 6, B2	GAPDH	5810
Day 6, B4	GAPDH	7510	7415	0.968367
Day 6, B4	GAPDH	7320
Day 6, B8	GAPDH	6990	6770	0.884133
Day 6, B8	GAPDH	6550
Day 9, B2	GAPDH	10300	10950	1.43002
Day 9, B2	GAPDH	11600
Day 9, B4	GAPDH	9700	8950	1.16883
Day 9, B4	GAPDH	8200
Day 9, B8	GAPDH	8700	9050	1.18189
Day 9, B8	GAPDH	9400
Day 14, B2	GAPDH	7250	7675	1.00232
Day 14, B2	GAPDH	8100
Day 14, B4	GAPDH	5220	5280	0.689545
Day 14, B4	GAPDH	5340
Day 14, B8	GAPDH	4920	4910	0.641225
Day 14, B8	GAPDH	4900

## Sheet: TNN2
Sample	Target	Conc	Avg conc		TNN2	day 1	day 2	day 4	day 6	day 9	day 14
Day 1, B2	TNNT2	0.06	0.06		B2	0.06	0.15	774	3120	4675	2134
Day 1, B2	TNNT2	0.06			B4	0.15	0.18	805	3325	3500	2176
Day 1, B4	TNNT2	0.18	0.15		B8	0.06	0.09	3560	6775	4570	2815
Day 1, B4	TNNT2	0.12
Day 1, B8	TNNT2	0.06	0.06
Day 1, B8	TNNT2	0.06			GAPDH norm factors	day 1	day 2	day 4	day 6	day 9	day 14
Day 2, B2	TNNT2	0.24	0.15		B2	0.787492	1.15577	0.583763	0.708481	1.43002	1.00232
Day 2, B2	TNNT2	0.06			B4	1.1623	1.37778	0.970326	0.968367	1.16883	0.689545
Day 2, B4	TNNT2	0.18	0.18		B8	1.04868	1.31249	0.926576	0.884133	1.18189	0.641225
Day 2, B4	TNNT2	0.18
Day 2, B8	TNNT2	0.12	0.09
Day 2, B8	TNNT2	0.06			Normalized TNN2	day 1	day 2	day 4	day 6	day 9	day 14
Day 4, B2	TNNT2	764	774		B2	0.0761913	0.129783	1325.88	4403.78	3269.18	2129.06
Day 4, B2	TNNT2	784			B4	0.129054	0.130645	829.618	3433.62	2994.44	3155.7
Day 4, B4	TNNT2	818	805		B8	0.0572146	0.0685721	3842.1	7662.88	3866.69	4390.04
Day 4, B4	TNNT2	792
Day 4, B8	TNNT2	3510	3560
Day 4, B8	TNNT2	3610
Day 6, B2	TNNT2	3000	3120
Day 6, B2	TNNT2	3240
Day 6, B4	TNNT2	3300	3325
Day 6, B4	TNNT2	3350
Day 6, B8	TNNT2	6730	6775
Day 6, B8	TNNT2	6820
Day 9, B2	TNNT2	4700	4675
Day 9, B2	TNNT2	4650
Day 9, B4	TNNT2	3460	3500
Day 9, B4	TNNT2	3540
Day 9, B8	TNNT2	4700	4570
Day 9, B8	TNNT2	4440
Day 14, B2	TNNT2	2507	2134
Day 14, B2	TNNT2	1761
Day 14, B4	TNNT2	2093	2176
Day 14, B4	TNNT2	2259
Day 14, B8	TNNT2	2760	2815
Day 14, B8	TNNT2	2870
RTNTC	TNNT2	0
RTNTC	TNNT2	0
RTNTC	TNNT2	0.06
NTC	TNNT2	0
NTC	TNNT2	0
NTC	TNNT2	0

## Sheet: OCT
Sample	Target	Conc	Avg conc		OCT 3/4	day 1	day 2	day 4	day 6	day 9	day 14
Day 1, B2	OCT3/4	1874	1961		B2	1961	2173.5	97.2	41.85	3.15	5.55
Day 1, B2	OCT3/4	2048			B4	2797	2825	474.5	85.7	3.7	2.8
Day 1, B4	OCT3/4	2890	2797		B8	2860	2547.5	283.5	73.2	4.4	1.2
Day 1, B4	OCT3/4	2704
Day 1, B8	OCT3/4	2780	2860
Day 1, B8	OCT3/4	2940			GAPDH norm factors	day 1	day 2	day 4	day 6	day 9	day 14
Day 2, B2	OCT3/4	2215	2173.5		B2	0.787492	1.15577	0.583763	0.708481	1.43002	1.00232
Day 2, B2	OCT3/4	2132			B4	1.1623	1.37778	0.970326	0.968367	1.16883	0.689545
Day 2, B4	OCT3/4	2830	2825		B8	1.04868	1.31249	0.926576	0.884133	1.18189	0.641225
Day 2, B4	OCT3/4	2820
Day 2, B8	OCT3/4	2552	2547.5
Day 2, B8	OCT3/4	2543			Normalized OCT	day 1	day 2	day 4	day 6	day 9	day 14
Day 4, B2	OCT3/4	95.3	97.2		B2	2490.18	1880.56	166.506	59.07	2.20276	5.53714
Day 4, B2	OCT3/4	99.1			B4	2406.43	2050.39	489.011	88.4995	3.16556	4.06065
Day 4, B4	OCT3/4	479	474.5		B8	2727.23	1940.97	305.965	82.793	3.72285	1.87142
Day 4, B4	OCT3/4	470
Day 4, B8	OCT3/4	282	283.5
Day 4, B8	OCT3/4	285
Day 6, B2	OCT3/4	40.8	41.85
Day 6, B2	OCT3/4	42.9
Day 6, B4	OCT3/4	86.9	85.7
Day 6, B4	OCT3/4	84.5
Day 6, B8	OCT3/4	76.6	73.2
Day 6, B8	OCT3/4	69.8
Day 9, B2	OCT3/4	3	3.15
Day 9, B2	OCT3/4	3.3
Day 9, B4	OCT3/4	3.8	3.7
Day 9, B4	OCT3/4	3.6
Day 9, B8	OCT3/4	4.5	4.4
Day 9, B8	OCT3/4	4.3
Day 14, B2	OCT3/4	6.7	5.55
Day 14, B2	OCT3/4	4.4
Day 14, B4	OCT3/4	2.4	2.8
Day 14, B4	OCT3/4	3.2
Day 14, B8	OCT3/4	1.3	1.2
Day 14, B8	OCT3/4	1.1
RTNTC	OCT3/4	0.06
RTNTC	OCT3/4	0
RTNTC	OCT3/4	0.06
NTC	OCT3/4	0
NTC	OCT3/4	0
NTC	OCT3/4	0

## Sheet: NKX
Sample	Target	Conc	Avg conc		NKX2.5	day 1	day 2	day 4	day 6	day 9	day 14
Day 1, B2	NKX2.5	1.5	1.55		B2	1.55	2.8	56.25	105.4	184.5	75.65
Day 1, B2	NKX2.5	1.6			B4	1.5	2.55	47.8	138	132	80.5
Day 1, B4	NKX2.5	1.7	1.5		B8	1.45	7.4	203	277.5	182.5	125.5
Day 1, B4	NKX2.5	1.3
Day 1, B8	NKX2.5	1.3	1.45
Day 1, B8	NKX2.5	1.6			GAPDH norm factors	day 1	day 2	day 4	day 6	day 9	day 14
Day 2, B2	NKX2.5	2.7	2.8		B2	0.787492	1.15577	0.583763	0.708481	1.43002	1.00232
Day 2, B2	NKX2.5	2.9			B4	1.1623	1.37778	0.970326	0.968367	1.16883	0.689545
Day 2, B4	NKX2.5	2.3	2.55		B8	1.04868	1.31249	0.926576	0.884133	1.18189	0.641225
Day 2, B4	NKX2.5	2.8
Day 2, B8	NKX2.5	7.4	7.4
Day 2, B8	NKX2.5	7.4			Normalized NKX2.5	day 1	day 2	day 4	day 6	day 9	day 14
Day 4, B2	NKX2.5	52.5	56.25		B2	1.96827	2.42262	96.3577	148.769	129.019	75.4748
Day 4, B2	NKX2.5	60			B4	1.29054	1.8508	49.2618	142.508	112.933	116.744
Day 4, B4	NKX2.5	46.9	47.8		B8	1.38269	5.63815	219.086	313.867	154.414	195.719
Day 4, B4	NKX2.5	48.7
Day 4, B8	NKX2.5	183	203
Day 4, B8	NKX2.5	223
Day 6, B2	NKX2.5	93.8	105.4
Day 6, B2	NKX2.5	117
Day 6, B4	NKX2.5	136	138
Day 6, B4	NKX2.5	140
Day 6, B8	NKX2.5	292	277.5
Day 6, B8	NKX2.5	263
Day 9, B2	NKX2.5	163	184.5
Day 9, B2	NKX2.5	206
Day 9, B4	NKX2.5	129	132
Day 9, B4	NKX2.5	135
Day 9, B8	NKX2.5	179	182.5
Day 9, B8	NKX2.5	186
Day 14, B2	NKX2.5	70.2	75.65
Day 14, B2	NKX2.5	81.1
Day 14, B4	NKX2.5	83.6	80.5
Day 14, B4	NKX2.5	77.4
Day 14, B8	NKX2.5	119	125.5
Day 14, B8	NKX2.5	132
RTNTC	NKX2.5	0
RTNTC	NKX2.5	0
RTNTC	NKX2.5	0
NTC	NKX2.5	0
NTC	NKX2.5	0
NTC	NKX2.5	0
