# Supplementary material for: Cell-free DNA as a potential biomarker of differentiation and toxicity in cardiac organoids
Source: eLife journal article supplement (doi:10.7554/elife.83532), 2023-06-01
Supplement: fig2-data1 [file Figure 2B,C_cardiac cfDNA concentrations.xlsx]

## Sheet: Sheet1
													Batch 1
													Day:	Day 1	Day 2	Day 4	Day 6	Day 9
												Technical replicates	1	0.141	0.094	0.179	0.284	0.359
													2	0.11	0.0781	0.167	0.253	0.377
													3	0.114	0.0775	0.134	0.253	0.383
													Avg conc	0.121667	0.0832	0.16	0.263333	0.373
													(ng/ul)
Avg cfDNA concentrations	Day 1	Day 2	Day 4	Day 6	Day 7	Day 9	Day 14
Batch 1	0.121667	0.0832	0.16	0.263333	0.228667	0.373	0.892						Batch 2
Batch 2	0.1695	0.160667	0.242	0.402667	0.33	0.358667	0.829667						Day:	Day 1	Day 2	Day 4	Day 6	Day 9
Batch 4	0.0988	0.0729	0.281333	0.463667	0.446	0.466	0.920667					Technical replicates	1	0.19	0.1	0.24	0.365	0.334
													2		0.232	0.153	0.391	0.256
gDNA conc (ng/ul))													3	0.149	0.15	0.333	0.452	0.486
Batch 2	4.47	11	17	29	33	41	26						Avg conc	0.1695	0.160667	0.242	0.402667	0.358667
Batch 4	9.5	19	33	27	34	43	40						(ng/ul)
Avg	6.985	15	25	28	33.5	42	33
cfDNA normalized to avg gDNA X 100
	Day 1	Day 2	Day 4	Day 6	Day 7	Day 9	Day 14
Batch 1	1.74183	0.554667	0.64	0.940476	0.682587	0.888095	2.70303
Batch 2	2.42663	1.07111	0.968	1.4381	0.985075	0.853968	2.51414
Batch 4	1.41446	0.486	1.12533	1.65595	1.33134	1.10952	2.7899						Batch 4	Day 1	Day 2	Day 4	Day 6	Day 9
												Technical replicates	1	0.11	0.0601	0.25	0.524	0.551
													2	0.0754	0.063	0.245	0.394	0.396
													3	0.111	0.0956	0.349	0.473	0.451
													Avg conc	0.0988	0.0729	0.281333	0.463667	0.466
													(ng/ul)
