# Supplementary material for: Cell-free DNA as a potential biomarker of differentiation and toxicity in cardiac organoids
Source: eLife journal article supplement (doi:10.7554/elife.83532), 2023-06-01
Supplement: fig3-data1 [file 3D_normalized_mitochondrial DNA copy number_tissue level.xlsx]

## Sheet: BBS_20220104_cardiacTissue_mito
Sample	Target	Concentration	Norm factor	Avg actB
B2, D1	actB	13	0.618557	21.0167
B4, D1	actB	8.8	0.418715
B8, D1	actB	24.6	1.1705
B2, D2	actB	8.8	0.418715
B4, D2	actB	18.8	0.894528
B8, D2	actB	25.2	1.19905
B2, D4	actB	17.7	0.842189
B4, D4	actB	15.5	0.73751
B8, D4	actB	31.1	1.47978
B2, D6	actB	18.7	0.88977
B4, D6	actB	23.3	1.10864
B8, D6	actB	26.8	1.27518
B2, D9	actB	21.3	1.01348
B4, D9	actB	25.2	1.19905
B8, D9	actB	26.2	1.24663
B2, D14	actB	18.6	0.885012
B4, D14	actB	24.8	1.18002
B8, D14	actB	29.9	1.42268
NTC	actB	0
B	Blank	Blank
B	Blank	Blank	Normalized
B2, D1	mtCOX2	1193	1928.68
B4, D1	mtCOX2	1162	2775.16
B8, D1	mtCOX2	3140	2682.62
B2, D2	mtCOX2	1316	3142.95
B4, D2	mtCOX2	2079	2324.13
B8, D2	mtCOX2	2886	2406.91
B2, D4	mtCOX2	1435	1703.89
B4, D4	mtCOX2	1376	1865.74
B8, D4	mtCOX2	1764	1192.07
B2, D6	mtCOX2	1500	1685.83
B4, D6	mtCOX2	1750	1578.51
B8, D6	mtCOX2	2189	1716.62
B2, D9	mtCOX2	1911	1885.58
B4, D9	mtCOX2	2242	1869.82
B8, D9	mtCOX2	2096	1681.33
B2, D14	mtCOX2	1852	2092.63
B4, D14	mtCOX2	2478	2099.97
B8, D14	mtCOX2	4490	3156.01
NTC	mtCOX2	0.031
B2, D1	ND4	1266	2046.7
B4, D1	ND4	1220	2913.67
B8, D1	ND4	3351	2862.88
B2, D2	ND4	1384	3305.35
B4, D2	ND4	2178	2434.8
B8, D2	ND4	3086	2573.71
B2, D4	ND4	1496	1776.32
B4, D4	ND4	1437	1948.45
B8, D4	ND4	1863	1258.97
B2, D6	ND4	1525	1713.93
B4, D6	ND4	1805	1628.12
B8, D6	ND4	2284	1791.12
B2, D9	ND4	1963	1936.89
B4, D9	ND4	2319	1934.03
B8, D9	ND4	2198	1763.15
B2, D14	ND4	1936	2187.54
B4, D14	ND4	2536	2149.12
B8, D14	ND4	4860	3416.09
NTC	ND4	0.031
B2, D1	ND6	1153	1864.02
B4, D1	ND6	1001	2390.65
B8, D1	ND6	3331	2845.79
B2, D2	ND6	1132	2703.51
B4, D2	ND6	1992	2226.87
B8, D2	ND6	3036	2532.01
B2, D4	ND6	1275	1513.91
B4, D4	ND6	1159	1571.5
B8, D4	ND6	1958	1323.17
B2, D6	ND6	1455	1635.25
B4, D6	ND6	1799	1622.7
B8, D6	ND6	2246	1761.32
B2, D9	ND6	1738	1714.88
B4, D9	ND6	2158	1799.76
B8, D9	ND6	2056	1649.25
B2, D14	ND6	1637	1849.69
B4, D14	ND6	2338	1981.33
B8, D14	ND6	3740	2628.84
NTC	ND6	0.17
