# Supplementary material for: Cell-free DNA as a potential biomarker of differentiation and toxicity in cardiac organoids
Source: eLife journal article supplement (doi:10.7554/elife.83532), 2023-06-01
Supplement: fig3-data1 [file 3H, I_normalized_cardiac cfDNA mito markers ultracentrifuged.xlsx]

## Sheet: Sheet1
Sample	ND1	Avg ND1	COX2	Avg COX2
D2 1.1	129.4	120.85	133	122.5
	112.3		112
D2 B2.2	121.2	122.15	122	125.5
	123.1		129
D6 1.3	29.8	27.95	17.4	16.45
	26.1		15.5
D6 B2.1	64	67.6	58.2	59.95
	71.2		61.7
D2 2.2	109.6	102.3	111	104.6
	95		98.2
D2 B4.1	264	278.5	266	286.5
	293		307
D6 2.4	41.7	37	27.6	27.3
	32.3		27
D6 B4.1	81.9	83.6	71.3	70.9
	85.3		70.5
D2 3.2	256	248	250	244
	240		238
D2 B8.2	143.5	148.8	147	153.5
	154.1		160
D6 3.2	62.4	62.8	48.8	47.35
	63.2		45.9
D6 B8.1	58.5	60.85	44.3	44.5
	63.2		44.7
D2 tox.1	195	197	196	202.5
	199		209
D6 tox.1	37.3	35.4	24.3	24.45
	33.5		24.6
