# Supplementary material for: Cell-free DNA as a potential biomarker of differentiation and toxicity in cardiac organoids
Source: eLife journal article supplement (doi:10.7554/elife.83532), 2023-06-01
Supplement: fig4-data1 [file 4E_raw data and normalization_p53 western quantification.xlsx]

## Sheet: Sheet1
Sample	Vinculin	Vinculin highest	Vinculin adjusted		VDAC unadjusted	VDAC normalized to vinculin	norm VDAC - norm to Day 1		p53 unadjusted	p53 normalized to vinculin	norm p53 - norm to day 1
D1 B1	15774.6	20533.1	0.76825		6888.22	8966.12	1		977.614	1272.52	1
D1 B2	20533.1		1		10395.5	10395.5	1		1464.13	1464.13	1
D1 B3	16455.1		0.801391		8549.13	10667.9	1		1478.1	1844.42	1
D2 B1	15066.2		0.73375		9052.92	12337.9	1.37606		2171.64	2959.65	2.32582
D2 B2	18411.8		0.896688		12821	14298.2	1.37542		1953.36	2178.42	1.48786
D2 B3	15509.8		0.755352		9788.43	12958.8	1.21475		2103.61	2784.93	1.50992
D4 B1	12057.3		0.587212		7575.15	12900.2	1.43877		426.437	726.206	0.570683
D4 B2	15898.3		0.774273		10640	13741.9	1.32191		1184.57	1529.91	1.04493
D4 B3	13925.2		0.678182		7651.06	11281.7	1.05754		972.041	1433.3	0.777102
D9 B1	15334.2		0.746801		13910.2	18626.3	2.07741		357.249	478.372	0.375925
D9 B2	19500.2		0.949694		16580.4	17458.6	1.67944		495.806	522.069	0.356573
D9 B3	17236.3		0.839439		15074.9	17958.3	1.6834		420.751	501.229	0.271754
