# Supplementary material for: Cell-free DNA as a potential biomarker of differentiation and toxicity in cardiac organoids
Source: eLife journal article supplement (doi:10.7554/elife.83532), 2023-06-01
Supplement: fig4-figsupp1-data1 [file elife-83532-fig4-figsupp1-data1-v2.zip]

## Sheet: BBS_20220310_cardiac cfDNA oct 
Sample	Target	Concentration			Oct 3/4										Sox17
B1, D1	Oct3/4	18.2					D1	D2	D4	D6	D9						D1	D2	D4	D6	D9
B2, D1	Oct3/4	0.15			B1		18.2	7.2	13.1	18.3	18.3				B1		4.1	2.4	3.2	4.1	4.3
B4, D1	Oct3/4	14.3			B2		0.15	3.2	14.5	17.9	8.9				B2		0.09	0.47	3.2	4	2.7
B1, D2	Oct3/4	7.2			B4		14.3	11.5	17.2	7.3	21				B4		3.8	2.7	4.1	1.63	5
B2, D2	Oct3/4	3.2
B4, D2	Oct3/4	11.5
B1, D4	Oct3/4	13.1
B2, D4	Oct3/4	14.5
B4, D4	Oct3/4	17.2
B1, D6	Oct3/4	18.3
B2, D6	Oct3/4	17.9
B4, D6	Oct3/4	7.3
B1, D9	Oct3/4	18.3
B2, D9	Oct3/4	8.9
B4, D9	Oct3/4	21
NTC	Oct3/4	0.015
B1, D1	Sox17	4.1
B2, D1	Sox17	0.09
B4, D1	Sox17	3.8
B1, D2	Sox17	2.4
B2, D2	Sox17	0.47
B4, D2	Sox17	2.7
B1, D4	Sox17	3.2
B2, D4	Sox17	3.2
B4, D4	Sox17	4.1
B1, D6	Sox17	4.1
B2, D6	Sox17	4
B4, D6	Sox17	1.63
B1, D9	Sox17	4.3
B2, D9	Sox17	2.7
B4, D9	Sox17	5
NTC	Sox17	0.015
