# Supplementary material for: Cell-free DNA as a potential biomarker of differentiation and toxicity in cardiac organoids
Source: eLife journal article supplement (doi:10.7554/elife.83532), 2023-06-01
Supplement: fig5-data1 [file 5H_raw_ cardiotox Beat counts.xlsx]

## Sheet: Beat counts on day 9 (mature)
		Notes: 10 frames per sec = 150 frames for 15 sec, counted number contractions in 15 sec, or in 150 frames, multiplied by 4 for beats per min. 3 tissues imaged per replicate, per timepoint. Average for final calculations.
				Shows counts in 15 s, multiplied by 4 for beats per min (a couple videos were 10s, so multiplied by 6 - got similar counts as in the 15s multiplied by 4											Rounded to nearest whole number
							replicate 1				DMSO	CPI (early)	DOX (early)		Irregular beating in red
											20	24	4
											24	28	0
											28	28	0
											24	26.6667	1.33333
							Replicate 2				DMSO	CPI (early)	DOX (early)
												20	0
											20	28	0
											28	8	0
											16		0
												8
											21.3333	16	0
							Replicate 3
											DMSO	CPI (early)	DOX (early)
											20	12	0
											12	12	0
											20	12	0
											12
											16
											16	12	0
							Total
											DMSO	CPI (early)	DOX (early)
											24	26.6667	1.33333
											21.3333	16	0
											16	12	0
