# Supplementary material for: Cell-free DNA as a potential biomarker of differentiation and toxicity in cardiac organoids
Source: eLife journal article supplement (doi:10.7554/elife.83532), 2023-06-01
Supplement: fig5-data1 [file 5I_raw_cardiotox avg tissue size.xlsx]

## Sheet: day 9
R1	Avg area (um^2)
	DMSO	DOX early	CPI early
Tissue 1	224943	23418.7	103245
Tissue 2	187563	19408.8	80992.3
Tissue 3	212679	20886.7	91670.1
Avg	208395	21238.1	91969.3
Avg x1000um2	208.395	21.2381	91.9693
R2	Avg area (um^2)
	DMSO	DOX early	CPI early
Tissue 1	199549	43880.1	88771.6
Tissue 2	256248	29291.7	145407
Tissue 3		32095.5	140893
			111593
Avg	227899	35089.1	121666
Avg x1000um2	227.899	35.0891	121.666
R3	Avg area (um^2)
	DMSO	DOX early	CPI early
Tissue 1		26205.8	127871
Tissue 2	188152	25359.9	125322
Tissue 3	228546	30640.6	133366
	234566
	225821
Avg	219271	27402.1	128853
Avg x1000um2	219.271	27.4021	128.853
