# Supplementary material for: Cell-free DNA as a potential biomarker of differentiation and toxicity in cardiac organoids
Source: eLife journal article supplement (doi:10.7554/elife.83532), 2023-06-01
Supplement: fig5-data1 [file Figure 5J normalized_ddPCR_3D cardiotox tissue Nkx2.5 TBP.xlsx]

## Sheet: BBS_20220622_redo 3D cardiotox 
Sample	Target	Concentration	Avg	Normalized				Sample	Target	Concentration	Avg	Avg tot TBP	Norm factor			Day 6 DMSO	Day 6 CPI	Day 6 DOX	Day 9 DMSO	Day 9 CPI early	Day 9 CPI late	Day 9 DOX late
D6 CPI R1	NKX2.5	34.1	34.3	87.2108				D6 CPI R1	TBP	5	4.75	12.0773	0.3933			43.3007	87.2108	110.361	32.8529	63.5136	61.2745	81.4515
D6 CPI R1	NKX2.5	34.5						D6 CPI R1	TBP	4.5						52.2833	70.6057	104.229	45.2444	44.8893	59.7225	65.8004
D6 CPI R2	NKX2.5	21.7	19	70.6057				D6 CPI R2	TBP	3.7	3.25		0.2691			43.501	50.6029	87.4166	45.3188	58.3189	49.3275	77.8476
D6 CPI R2	NKX2.5	16.3						D6 CPI R2	TBP	2.8
D6 CPI R3	NKX2.5	56.2	54.05	50.6029				D6 CPI R3	TBP	13.5	12.9		1.06812
D6 CPI R3	NKX2.5	51.9						D6 CPI R3	TBP	12.3
D6 DMSO R1	NKX2.5	66.7	68.3	43.3007				D6 DMSO R1	TBP	18.9	19.05		1.57734
D6 DMSO R1	NKX2.5	69.9						D6 DMSO R1	TBP	19.2
D6 DMSO R2	NKX2.5	43.7	50.65	52.2833				D6 DMSO R2	TBP	8.9	11.7		0.96876
D6 DMSO R2	NKX2.5	57.6						D6 DMSO R2	TBP	14.5
D6 DMSO R3	NKX2.5	53.3	57.45	43.501				D6 DMSO R3	TBP	15.8	15.95		1.32066
D6 DMSO R3	NKX2.5	61.6						D6 DMSO R3	TBP	16.1
D6 DOX R1	NKX2.5	8.1	7.95	110.361				D6 DOX R1	TBP	0.84	0.87		0.072036
D6 DOX R1	NKX2.5	7.8						D6 DOX R1	TBP	0.9
D6 DOX R2	NKX2.5	6.1	6.3	104.229				D6 DOX R2	TBP	0.46	0.73		0.060444
D6 DOX R2	NKX2.5	6.5						D6 DOX R2	TBP	1
D6 DOX R3	NKX2.5	6.9	7.6	87.4166				D6 DOX R3	TBP	1.1	1.05		0.08694
D6 DOX R3	NKX2.5	8.3						D6 DOX R3	TBP	1
D9 CPI early R1	NKX2.5	32.8	29.45	63.5136				D9 CPI early R1	TBP	6.4	5.6		0.46368
D9 CPI early R1	NKX2.5	26.1						D9 CPI early R1	TBP	4.8
D9 CPI early R2	NKX2.5	74.6	72.85	44.8893				D9 CPI early R2	TBP	20	19.6		1.62288
D9 CPI early R2	NKX2.5	71.1						D9 CPI early R2	TBP	19.2
D9 CPI early R3	NKX2.5	92.7	88.85	58.3189				D9 CPI early R3	TBP	20.1	18.4		1.52352
D9 CPI early R3	NKX2.5	85						D9 CPI early R3	TBP	16.7
D9 CPI late R1	NKX2.5	68.6	69	61.2745				D9 CPI late R1	TBP	14.4	13.6		1.12608
D9 CPI late R1	NKX2.5	69.4						D9 CPI late R1	TBP	12.8
D9 CPI late R2	NKX2.5	92.6	94.45	59.7225				D9 CPI late R2	TBP	19	19.1		1.58148
D9 CPI late R2	NKX2.5	96.3						D9 CPI late R2	TBP	19.2
D9 CPI late R3	NKX2.5	180	155	49.3275				D9 CPI late R3	TBP	44.4	37.95		3.14226
D9 CPI late R3	NKX2.5	130						D9 CPI late R3	TBP	31.5
D9 DMSO R1	NKX2.5	41.3	49.1	32.8529				D9 DMSO R1	TBP	15.6	18.05		1.49454
D9 DMSO R1	NKX2.5	56.9						D9 DMSO R1	TBP	20.5
D9 DMSO R2	NKX2.5	162.1	161.65	45.2444				D9 DMSO R2	TBP	46.2	43.15		3.57282
D9 DMSO R2	NKX2.5	161.2						D9 DMSO R2	TBP	40.1
D9 DMSO R3	NKX2.5	92.5	97.75	45.3188				D9 DMSO R3	TBP	23.8	26.05		2.15694
D9 DMSO R3	NKX2.5	103						D9 DMSO R3	TBP	28.3
D9 DOX early R1	NKX2.5	6.2	6.8	190.99				D9 DOX early R1	TBP	0.4	0.43		0.035604
D9 DOX early R1	NKX2.5	7.4						D9 DOX early R1	TBP	0.46
D9 DOX early R2	NKX2.5	7.6	7.4	#DIV/0!				D9 DOX early R2	TBP	0	0		0
D9 DOX early R2	NKX2.5	7.2						D9 DOX early R2	TBP	0
D9 DOX early R3	NKX2.5	7.2	6.75	2717.39				D9 DOX early R3	TBP	0.06	0.03		0.002484
D9 DOX early R3	NKX2.5	6.3						D9 DOX early R3	TBP	0
D9 DOX late R1	NKX2.5	2.2	4.35	81.4515				D9 DOX late R1	TBP	0.23	0.645		0.053406
D9 DOX late R1	NKX2.5	6.5						D9 DOX late R1	TBP	1.06
D9 DOX late R2	NKX2.5	44.6	47.4	65.8004				D9 DOX late R2	TBP	9.2	8.7		0.72036
D9 DOX late R2	NKX2.5	50.2						D9 DOX late R2	TBP	8.2
D9 DOX late R3	NKX2.5	58.4	53.5	77.8476				D9 DOX late R3	TBP	9.2	8.3		0.68724
D9 DOX late R3	NKX2.5	48.6						D9 DOX late R3	TBP	7.4
