# Supplementary material for: Cell-free DNA as a potential biomarker of differentiation and toxicity in cardiac organoids
Source: eLife journal article supplement (doi:10.7554/elife.83532), 2023-06-01
Supplement: fig5-figsupp1-data1 [file Fig 5_Fig supplement 1_ E_raw_cardiotox avg tissue size.xlsx]

## Sheet: day 9
R1	Avg area (um^2)
	DMSO	DOX early	DOX late	CPI early	CPI late
Tissue 1	224943	23418.7	103153	103245	97447.6
Tissue 2	187563	19408.8	104122	80992.3	116083
Tissue 3	212679	20886.7	99900.7	91670.1	120708
Avg	208395	21238.1	102392	91969.3	111413
Avg x1000um2	208.395	21.2381	102.392	91.9693	111.413
R2	Avg area (um^2)
	DMSO	DOX early	DOX late	CPI early	CPI late
Tissue 1	199549	43880.1	168105	88771.6	155607
Tissue 2	256248	29291.7	170433	145407	241092
Tissue 3		32095.5	136757	140893	233515
			172984	111593	158565
Avg	227899	35089.1	162070	121666	197195
Avg x1000um2	227.899	35.0891	162.07	121.666	197.195
R3	Avg area (um^2)
	DMSO	DOX early	DOX late	CPI early	CPI late
Tissue 1		26205.8	182354	127871	181424
Tissue 2	188152	25359.9	169640	125322	179460
Tissue 3	228546	30640.6	162762	133366	170991
	234566				219874
	225821
Avg	219271	27402.1	171585	128853	187937
Avg x1000um2	219.271	27.4021	171.585	128.853	187.937
