# Supplementary material for: Cell-free DNA as a potential biomarker of differentiation and toxicity in cardiac organoids
Source: eLife journal article supplement (doi:10.7554/elife.83532), 2023-06-01
Supplement: fig5-figsupp1-data1 [file Fig 5_Fig supplement 1_D_raw_ cardiotox Beat counts.xlsx]

## Sheet: Beat counts on day 9 (mature)
		Notes: 10 frames per sec = 150 frames for 15 sec, counted number contractions in 15 sec, or in 150 frames, multiplied by 4 for beats per min. 3 tissues imaged per replicate, per timepoint. Average for final calculations.
				Shows counts in 15 s, multiplied by 4 for beats per min (a couple videos were 10s, so multiplied by 6 - got similar counts as in the 15s multiplied by 4													Rounded to nearest whole number
							replicate 1				DMSO	CPI (early)	DOX (early)	CPI (late)	DOX (late)		Irregular beating in red
											20	24	4	40	20
											24	28	0	24	20
											28	28	0	28	16
											24	26.6667	1.33333	30.6667	18.6667
							Replicate 2				DMSO	CPI (early)	DOX (early)	CPI (late)	DOX (late)
												20	0	12	16
											20	28	0	16	16
											28	8	0	12	12
											16		0	28	12
												8		28
											21.3333	16	0	19.2	14
							Replicate 3
											DMSO	CPI (early)	DOX (early)	CPI (late)	DOX (late)
											20	12	0	20	8
											12	12	0	12	12
											20	12	0	16	12
											12			20
											16
											16	12	0	17	10.6667
							Total
											DMSO	CPI (early)	DOX (early)	CPI (late)	DOX (late)
											24	26.6667	1.33333	30.6667	18.6667
											21.3333	16	0	19.2	14
											16	12	0	17	10.6667
