# Supplementary material for: Cell-free DNA as a potential biomarker of differentiation and toxicity in cardiac organoids
Source: eLife journal article supplement (doi:10.7554/elife.83532), 2023-06-01
Supplement: supp [file elife-83532-supp-v1.zip]

## Sheet: days 6 and 9, 3 replicates
Replicate 1						Replicate 2							Replicate 3
	DMSO (early)						DMSO (early)							DMSO (early)
	Day:	Day 6	Day 9				Day:	Day 6	Day 9					Day:	Day 6	Day 9			Absolute values (ng/ul) cfDNA and gDNA concentrations
Technical replicates	1	0.14	0.365			Technical replicates	1	0.345	0.718				Technical replicates	1	0.683	0.779				Day 6
	2	0.704	0.37				2	0.377	0.508					2	0.443	0.638
																				DMSO	CPI	DOX
	Avg conc	0.422	0.3675				Avg conc	0.361	0.613					Avg conc	0.563	0.7085			R1	0.422	0.4445	0.472
normalized to gDNA		0.0196279	0.0147			normalized to gDNA		0.00714851	0.0109464				normalized to gDNA		0.0116082	0.013243			R2	0.361	0.4325	0.54
normalized to gDNA x 100		1.96279	1.47			normalized to gDNA x 100		0.714851	1.09464				normalized to gDNA x 100		1.16082	1.3243			R3	0.563	0.4915	0.7485
gDNA conc		21.5	25			gDNA conc		50.5	56				gDNA conc		48.5	53.5			gDNA avg	40.1667	32.8333	30.6667
																				Day 9
																				DMSO	CPI early	CPI late	Dox early	Dox late
	CPI (early)						CPI (early)							CPI (early)					R1	0.3675	0.248	0.316	0.1455	0.3115
	Day:	Day 6	Day 9				Day:	Day 6	Day 9					Day:	Day 6	Day 9			R2	0.613	0.3305	0.5575	0.226	0.565
Technical replicates	1	0.513	0.271			Technical replicates	1	0.458	0.369				Technical replicates	1	0.416	0.408			R3	0.7085	0.466	0.5615	0.2155	0.6665
	2	0.376	0.225				2	0.407	0.292					2	0.567	0.524			gDNA avg	44.8333	20	33.1667	8.58667	18.2667
	Avg conc	0.4445	0.248				Avg conc	0.4325	0.3305					Avg conc	0.4915	0.466			Totals: cfDNA normalized to avg gDNA [of 3 tissues each], x 100
normalized to gDNA		0.01778	0.0206667			normalized to gDNA		0.0129104	0.0124717				normalized to gDNA		0.0122875	0.0216744
normalized to gDNA x 100		1.778	2.06667			normalized to gDNA x 100		1.29104	1.24717				normalized to gDNA x 100		1.22875	2.16744				Day 6
gDNA conc		25	12			gDNA conc		33.5	26.5				gDNA conc		40	21.5
																				DMSO	CPI	DOX
																			R1	1.05062	1.35381	1.53913
	DOX (early)						DOX (early)							DOX (early)					R2	0.898755	1.31726	1.76087
	Day:	Day 6	Day 9				Day:	Day 6	Day 9					Day:	Day 6	Day 9			R3	1.40166	1.49695	2.44076
Technical replicates	1	0.409	0.131			Technical replicates	1	0.763	0.223				Technical replicates	1	0.662	0.239
	2	0.535	0.16				2	0.317	0.229					2	0.835	0.192				Day 9
																				DMSO	CPI early	CPI late	Dox early	Dox late
	Avg conc	0.472	0.1455				Avg conc	0.54	0.226					Avg conc	0.7485	0.2155			R1	0.819703	1.24	0.952764	1.69449	1.70529
normalized to gDNA		0.0224762	0.0932692			normalized to gDNA		0.0144	0.013697				normalized to gDNA		0.0223433	0.027987			R2	1.36729	1.6525	1.6809	2.63199	3.09307
normalized to gDNA x 100		2.24762	9.32692			normalized to gDNA x 100		1.44	1.3697				normalized to gDNA x 100		2.23433	2.7987			R3	1.5803	2.33	1.69296	2.5097	3.64872
gDNA conc		21	1.56			gDNA conc		37.5	16.5				gDNA conc		33.5	7.7
	CPI (late)						CPI (late)							CPI (late)
	Day:	Day 9					Day:	Day 9						Day:	Day 9
Technical replicates	1	0.293				Technical replicates	1	0.63					Technical replicates	1	0.541
	2	0.339					2	0.485						2	0.582
	Avg conc	0.316					Avg conc	0.5575						Avg conc	0.5615
normalized to gDNA		0.0217931				normalized to gDNA		0.0125281					normalized to gDNA		0.0138642
normalized to gDNA x 100		2.17931				normalized to gDNA x 100		1.25281					normalized to gDNA x 100		1.38642
gDNA conc		14.5				gDNA conc		44.5					gDNA conc		40.5
	DOX (late)						DOX (late)							DOX (late)
	Day:	Day 9					Day:	Day 9						Day:	Day 9
Technical replicates	1	0.321				Technical replicates	1	0.514					Technical replicates	1	0.601
	2	0.302					2	0.616						2	0.732
	Avg conc	0.3115					Avg conc	0.565						Avg conc	0.6665
normalized to gDNA		0.0302427				normalized to gDNA		0.0251111					normalized to gDNA		0.0302955
normalized to gDNA x 100		3.02427				normalized to gDNA x 100		2.51111					normalized to gDNA x 100		3.02955
gDNA conc		10.3				gDNA conc		22.5					gDNA conc		22

## Sheet: gDNA
Replicate 1						Replicate 2							Replicate 3													Sample (all day 9)	gDNA concentration (ng/ul)	vol for 50ul of 1ng/ul	vol water
	DMSO (early)						DMSO (early)							DMSO (early)												R1, DMSO	25	2	48
	Day:	Day 6	Day 9				Day:	Day 6	Day 9					Day:	Day 6	Day 9			Summary gDNA concentrations							R1, CPI early	12	4.16667	45.8333
Technical replicates	1	0.14	0.365			Technical replicates	1	0.345	0.718				Technical replicates	1	0.683	0.779				Day 6						R1, CPI late	14.5	3.44828	46.5517
	2	0.704	0.37				2	0.377	0.508					2	0.443	0.638										R1, DOX early	1.56	32.0513	17.9487
																				DMSO	CPI	DOX				R1, DOX late	10.3	4.85437	45.1456
	Avg conc	0.422	0.3675				Avg conc	0.361	0.613					Avg conc	0.563	0.7085			R1	21.5	25	21
normalized to gDNA		0.0196279	0.0147			normalized to gDNA		0.00714851	0.0109464				normalized to gDNA		0.0116082	0.013243			R2	50.5	33.5	37.5				R2, DMSO	56	0.892857	49.1071
normalized to gDNA x 100		1.96279	1.47			normalized to gDNA x 100		0.714851	1.09464				normalized to gDNA x 100		1.16082	1.3243			R3	48.5	40	33.5				R2, CPI early	26.5	1.88679	48.1132
gDNA conc		21.5	25			gDNA conc		50.5	56				gDNA conc		48.5	53.5										R2, CPI late	44.5	1.1236	48.8764
																				Day 9						R2, DOX early	16.5	3.0303	46.9697
																				DMSO	CPI early	CPI late	Dox early	Dox late		R2, DOX late	22.5	2.22222	47.7778
	CPI (early)						CPI (early)							CPI (early)					R1	25	12	14.5	1.56	10.3
	Day:	Day 6	Day 9				Day:	Day 6	Day 9					Day:	Day 6	Day 9			R2	56	26.5	44.5	16.5	22.5		R3, DMSO	53.5	0.934579	49.0654
Technical replicates	1	0.513	0.271			Technical replicates	1	0.458	0.369				Technical replicates	1	0.416	0.408			R3	53.5	21.5	40.5	7.7	22		R3, CPI early	21.5	2.32558	47.6744
	2	0.376	0.225				2	0.407	0.292					2	0.567	0.524										R3, CPI late	40.5	1.23457	48.7654
																										R3, DOX early	7.7	6.49351	43.5065
	Avg conc	0.4445	0.248				Avg conc	0.4325	0.3305					Avg conc	0.4915	0.466										R3, DOX late	22	2.27273	47.7273
normalized to gDNA		0.01778	0.0206667			normalized to gDNA		0.0129104	0.0124717				normalized to gDNA		0.0122875	0.0216744
normalized to gDNA x 100		1.778	2.06667			normalized to gDNA x 100		1.29104	1.24717				normalized to gDNA x 100		1.22875	2.16744										1ul per sample for total 1ng per rxn
gDNA conc		25	12			gDNA conc		33.5	26.5				gDNA conc		40	21.5
	DOX (early)						DOX (early)							DOX (early)
	Day:	Day 6	Day 9				Day:	Day 6	Day 9					Day:	Day 6	Day 9
Technical replicates	1	0.409	0.131			Technical replicates	1	0.763	0.223				Technical replicates	1	0.662	0.239
	2	0.535	0.16				2	0.317	0.229					2	0.835	0.192
	Avg conc	0.472	0.1455				Avg conc	0.54	0.226					Avg conc	0.7485	0.2155
normalized to gDNA		0.0224762	0.0932692			normalized to gDNA		0.0144	0.013697				normalized to gDNA		0.0223433	0.027987
normalized to gDNA x 100		2.24762	9.32692			normalized to gDNA x 100		1.44	1.3697				normalized to gDNA x 100		2.23433	2.7987
gDNA conc		21	1.56			gDNA conc		37.5	16.5				gDNA conc		33.5	7.7
	CPI (late)						CPI (late)							CPI (late)
	Day:	Day 9					Day:	Day 9						Day:	Day 9
Technical replicates	1	0.293				Technical replicates	1	0.63					Technical replicates	1	0.541
	2	0.339					2	0.485						2	0.582
	Avg conc	0.316					Avg conc	0.5575						Avg conc	0.5615
normalized to gDNA		0.0217931				normalized to gDNA		0.0125281					normalized to gDNA		0.0138642
normalized to gDNA x 100		2.17931				normalized to gDNA x 100		1.25281					normalized to gDNA x 100		1.38642
gDNA conc		14.5				gDNA conc		44.5					gDNA conc		40.5
	DOX (late)						DOX (late)							DOX (late)
	Day:	Day 9					Day:	Day 9						Day:	Day 9
Technical replicates	1	0.321				Technical replicates	1	0.514					Technical replicates	1	0.601
	2	0.302					2	0.616						2	0.732
	Avg conc	0.3115					Avg conc	0.565						Avg conc	0.6665
normalized to gDNA		0.0302427				normalized to gDNA		0.0251111					normalized to gDNA		0.0302955
normalized to gDNA x 100		3.02427				normalized to gDNA x 100		2.51111					normalized to gDNA x 100		3.02955
gDNA conc		10.3				gDNA conc		22.5					gDNA conc		22
