# Supplementary figures and images for: Cell-free DNA as a potential biomarker of differentiation and toxicity in cardiac organoids
Source: eLife journal article supplement (doi:10.7554/elife.83532), 2023-06-01

Figure 4-Figure Supplement 1

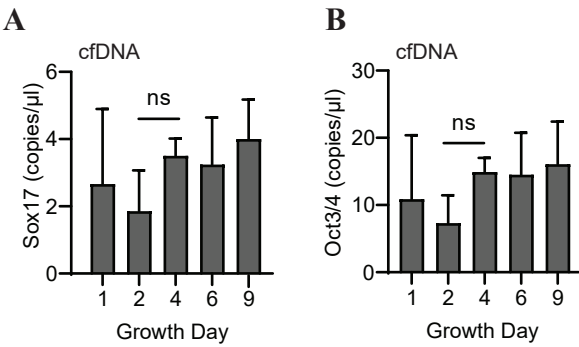

Supplement: supp [file elife-83532-supp-v1.zip]

**Figure 5 - Figure Supplement 1**

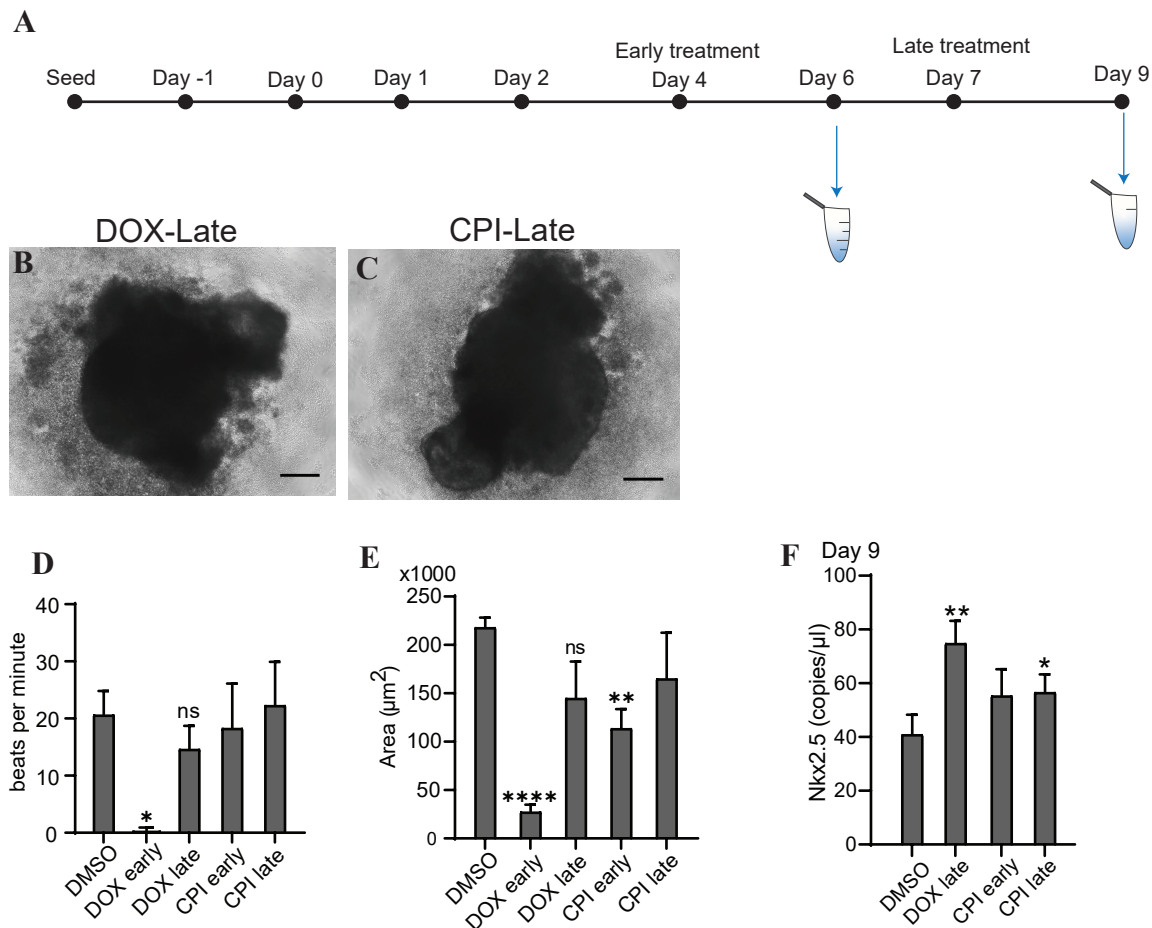

Supplement: supp [file elife-83532-supp-v1.zip]

Figure 6 - Figure Supplement 1

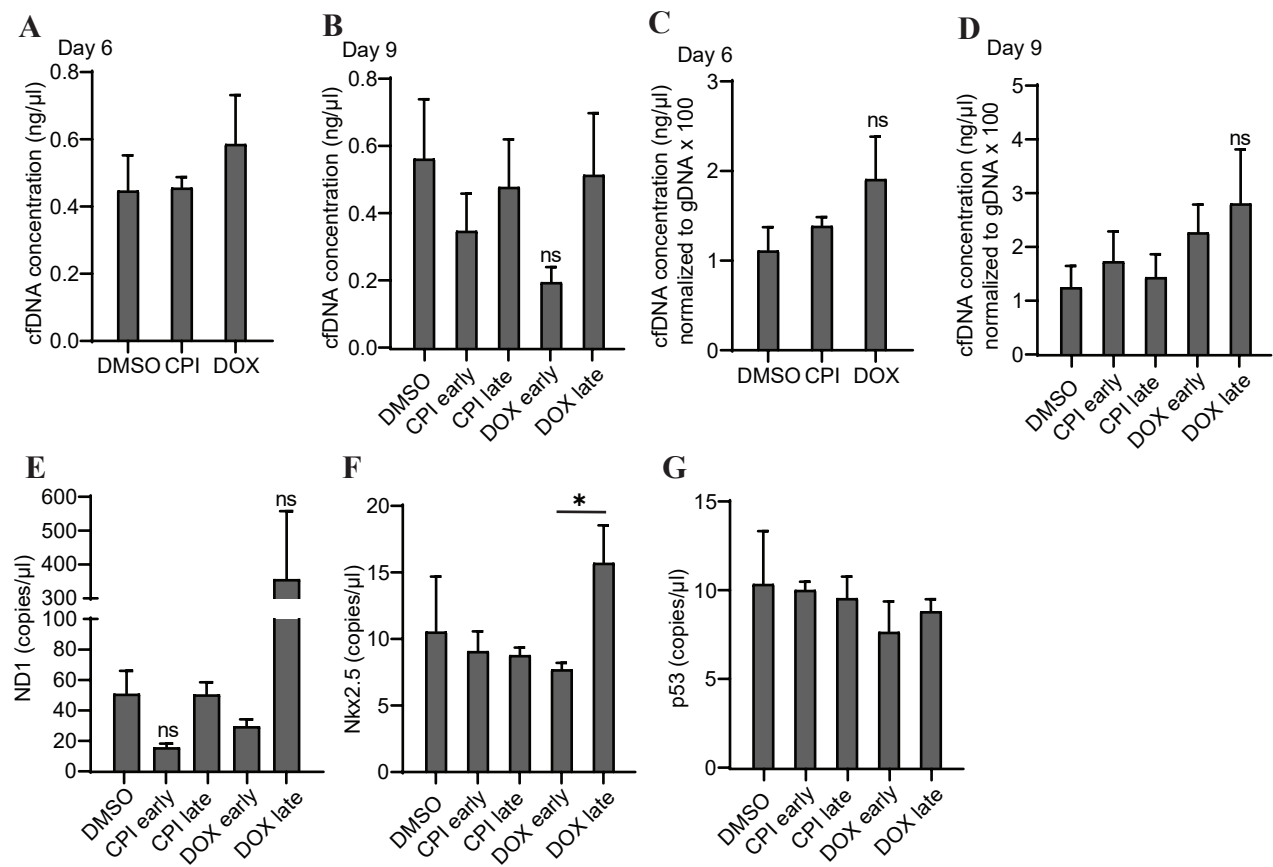

Supplement: supp [file elife-83532-supp-v1.zip]

**Figure 2 - Figure Supplement 1**

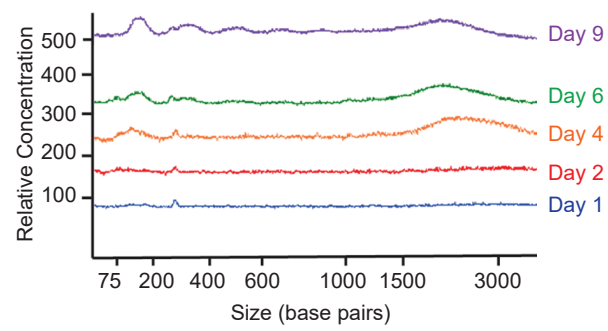

Supplement: supp [file elife-83532-supp-v1.zip]
